# Supplementary material for: Satellite DNA in Neotropical Deer Species
Source: Genes (Basel). 2021 Jan 19;12(1):123. doi: 10.3390/genes12010123 (PMC7835801; doi:10.3390/genes12010123)
Supplement: Supplementary file 1 [file genes-12-00123-s001.zip]

Archive with 5 entries (5 files):
- Table_S1.pdf
- Table_S2.pdf
- Table_S4.pdf
- Figure S1.pdf
- Table_S3.xlsx
