# Supplementary material for: Satellite DNA in Neotropical Deer Species
Source: Genes (Basel). 2021 Jan 19;12(1):123. doi: 10.3390/genes12010123 (PMC7835801; doi:10.3390/genes12010123)
Supplement: Supplementary file 1 [file genes-12-00123-s001.zip › Table_S1.pdf]

**Table S1.** Primers and annealing temperatures for satellite DNA isolation.

| Target         | Primers                  |                          | Annealing temperature |
|----------------|--------------------------|--------------------------|-----------------------|
| SatI           | CAAGACGAAAGGATGTCTGAATCC | GGTGTCCATTCCACTTGAGGC    | 58oC                  |
| SatII          | CTGTGAGTGTGGAGCCCCGAGC   | GTGGGAAGAGGCAGAGCCGACC   | 64oC                  |
| SatIII         | GAGGTGTGACCGTGACAGGACCC  | CGAGGCTGGGATGTTGTGAGAAGC | 64oC                  |
| SatIII-partial | ACAGATGGAGAACATCCCTCTGG  | GTGAATACGAAAAGGACTGTGGG  | 57oC                  |
| SatIV          | TTGATATTAGGTGATTGGATGGG  | AAGATGTCAGAACTTCAGGTTTGC | 57oC                  |
