# Supplementary material for: Satellite DNA in Neotropical Deer Species
Source: Genes (Basel). 2021 Jan 19;12(1):123. doi: 10.3390/genes12010123 (PMC7835801; doi:10.3390/genes12010123)
Supplement: Supplementary file 1 [file genes-12-00123-s001.zip › Table_S2.pdf]

**Table S2.** Positions and sequences of the CENP-B binding motif in individual satII DNA clones.

| Sequence Name | Start | p-value  | q-value | Matched Sequence  |
|---------------|-------|----------|---------|-------------------|
| MGO_clone1    | 146   | 1.34e-05 | 0.00988 | TTTGGAGGCAGGCGGGG |
| MGO_clone2    | 146   | 1.34e-05 | 0.00988 | TTTGGAGGCAGGCGGGG |
| MGO_clone3    | 148   | 1.34e-05 | 0.00988 | TTTGGAGGCAGGCGGGG |
| MGO_clone4    | 146   | 1.34e-05 | 0.00988 | TTTGGAGGCAGGCGGGG |
| MNE_clone2    | 146   | 1.34e-05 | 0.00988 | TTTGGAGGCAGGCGGGG |
| MNE_clone3    | 146   | 1.34e-05 | 0.00988 | TTTGGAGGCAGGCGGGG |
| MNE_clone4    | 146   | 1.34e-05 | 0.00988 | TTTGGAGGCAGGCGGGG |
| MNA_clone1    | 146   | 1.36e-05 | 0.00563 | TTTGGAGGCAGGCGGGG |
| MNA_clone2    | 146   | 1.36e-05 | 0.00563 | TTTGGAGGCAGGCGGGG |
| MNA_clone3    | 146   | 1.36e-05 | 0.00563 | TTTGGAGGCAGGCGGGG |
| MNA_clone4    | 146   | 2.95e-05 | 0.00978 | TTTGGAGACAGGCGGGG |
| MBO_clone1    | 146   | 0.000262 | 0.0362  | TTTGCAGGCAGGCGGGG |
| MBO_clone2    | 146   | 0.000262 | 0.0362  | TTTGCAGGCAGGCGGGG |
| MBO_clone3    | 146   | 1.36e-05 | 0.00563 | TTTGGAGGCAGGCGGGG |
| MBO_clone4    | 146   | 0.000153 | 0.0307  | TTCGGAGGCAGGCGGGG |
| MAM_PR_clone1 | 146   | 1.34e-05 | 0.00988 | TTTGGAGGCAGGCGGGG |
| MAM_PR_clone2 | 146   | 1.34e-05 | 0.00988 | TTTGGAGGCAGGCGGGG |
| MAM_PR_clone4 | 146   | 1.34e-05 | 0.00988 | TTTGGAGGCAGGCGGGG |
| MAM_SA_clone1 | 146   | 1.34e-05 | 0.00988 | TTTGGAGGCAGGCGGGG |
| MAM_SA_clone2 | 146   | 1.34e-05 | 0.00988 | TTTGGAGGCAGGCGGGG |
| MAM_JU_clone2 | 146   | 1.34e-05 | 0.00988 | TTTGGAGGCAGGCGGGG |
| MAM_JU_clone3 | 146   | 1.34e-05 | 0.00988 | TTTGGAGGCAGGCGGGG |
| MAM_JU_clone4 | 146   | 1.34e-05 | 0.00988 | TTTGGAGGCAGGCGGGG |
| MAM_RR_clone1 | 146   | 1.34e-05 | 0.00988 | TTTGGAGGCAGGCGGGG |
| MAM_RR_clone2 | 146   | 2.87e-05 | 0.0204  | TTTGGATGCAGGCGGGG |
| MAM_RR_clone3 | 146   | 1.34e-05 | 0.00988 | TTTGGAGGCAGGCGGGG |
| MAM_RR_clone4 | 146   | 1.34e-05 | 0.00988 | TTTGGAGGCAGGCGGGG |
| BDI_clone1    | 146   | 1.36e-05 | 0.00563 | TTTGGAGGCAGGCGGGG |
| BDI_clone2    | 146   | 1.36e-05 | 0.00563 | TTTGGAGGCAGGCGGGG |
| BDI_clone3    | 146   | 1.36e-05 | 0.00563 | TTTGGAGGCAGGCGGGG |
| BDI_clone4    | 146   | 1.36e-05 | 0.00563 | TTTGGAGGCAGGCGGGG |
| OBE_clone2    | 146   | 1.34e-05 | 0.00988 | TTTGGAGGCAGGCGGGG |
| OBE_clone3    | 146   | 1.34e-05 | 0.00988 | TTTGGAGGCAGGCGGGG |
| OBE_clone4    | 146   | 1.34e-05 | 0.00988 | TTTGGAGGCAGGCGGGG |
| OVI_clone1    | 146   | 1.34e-05 | 0.00988 | TTTGGAGGCAGGCGGGG |
| OVI_clone2    | 145   | 1.34e-05 | 0.00988 | TTTGGAGGCAGGCGGGG |
| OVI_clone4    | 146   | 1.34e-05 | 0.00988 | TTTGGAGGCAGGCGGGG |
