# Supplementary material for: Satellite DNA in Neotropical Deer Species
Source: Genes (Basel). 2021 Jan 19;12(1):123. doi: 10.3390/genes12010123 (PMC7835801; doi:10.3390/genes12010123)
Supplement: Supplementary file 1 [file genes-12-00123-s001.zip › Table_S3.xlsx]

## Sheet: List1
Table S3. The sequence of the 31-bp satI subrepeat unit and its position in the satI DNA sequence
Motif	Sequence Name	Start	End	p-value	q-value	Matched Sequence
TCCCTGCCNCAACTCGAGAGGAANCCTGAGT	MNA_clone2	23	53	6.06e-06	0.00123	CCCCTGTGGAGTCCCTAGAGAAAGCCCTAGT
TCCCTGCCNCAACTCGAGAGGAANCCTGAGT	MNA_clone4	23	53	9.46e-06	0.00163	CCCCTGTGGAGACCCTAGAGAAAGGCCTAGT
TCCCTGCCNCAACTCGAGAGGAANCCTGAGT	MNA_clone3	23	53	9.46e-06	0.00163	CCTCTGAGGAGACCCTAGAGAAAGCCCTAGT
TCCCTGCCNCAACTCGAGAGGAANCCTGAGT	MBO_clone4	23	53	9.46e-06	0.00145	CCCCTGTGGAGACCCTATAGAAAGCCCTAGT
TCCCTGCCNCAACTCGAGAGGAANCCTGAGT	MAM_PR_clone4	23	53	1.37e-06	0.000304	CCCCTGAGGAGACCCTAGAGAAAGCCCTAGT
TCCCTGCCNCAACTCGAGAGGAANCCTGAGT	MAM_SA_clone4	23	53	1.37e-06	0.000335	CCCCTGAGGAGACCCTAGAGAAAGCCCTAGT
TCCCTGCCNCAACTCGAGAGGAANCCTGAGT	MAM_SA_clone3	23	53	1.37e-06	0.000335	CCCCTGAGGAGACCCTAGAGAAAGCCCTAGT
TCCCTGCCNCAACTCGAGAGGAANCCTGAGT	MAM_SA_clone2	23	53	2.56e-05	0.00357	CCCCTGTTGGGTCCCTAGAGAAAGCCCAAGA
TCCCTGCCNCAACTCGAGAGGAANCCTGAGT	MAM_JU_clone1	23	53	5.48e-05	0.00637	CCTCTGTGGAGACCCTATAGAAAGCCCTAGT
TCCCTGCCNCAACTCGAGAGGAANCCTGAGT	MAM_RR_clone4	23	53	6.06e-06	0.00113	CCCCTGTGGAATCCCTAGAGAAAGCCCTAGG
TCCCTGCCNCAACTCGAGAGGAANCCTGAGT	BDI_clone4	23	53	8.47e-06	0.0015	CCCCTGTGGAGACCCTAGGGAAAACCCTAGT
TCCCTGCCNCAACTCGAGAGGAANCCTGAGT	BDI_clone2	23	53	9.46e-06	0.00155	CCCCTGTGGAGACCCTAGAGAAAGGCCTAGT
TCCCTGCCNCAACTCGAGAGGAANCCTGAGT	OBE_clone4	23	53	9.46e-06	0.0015	CCCCTGTGGAGACCCTATAGAAAGCCCTAGT
TCCCTGCCNCAACTCGAGAGGAANCCTGAGT	OBE_clone1	23	53	9.46e-06	0.0015	CCCCTGTGGAGACCCTATAGAAAGCCCTAGT
TCCCTGCCNCAACTCGAGAGGAANCCTGAGT	OVI_clone4	23	53	6.06e-06	0.001	CCCCTGTGGAGACCCTAGAGAAAGCCCTAGG
TCCCTGCCNCAACTCGAGAGGAANCCTGAGT	OVI_clone3	23	53	6.06e-06	0.001	CCCCTGTGGAGACACTAGAGAAAGCCCTAGG
TCCCTGCCNCAACTCGAGAGGAANCCTGAGT	OVI_clone1	23	53	9.46e-06	0.00143	CCCCTGTGGAGACCCTATAGAAAGCCCAAGT
TCCCTGCCNCAACTCGAGAGGAANCCTGAGT	OVI_clone2	23	53	3.68e-05	0.00438	CCTCTGTGGAGACACTAGAGAAAGCCCTAGG
TCCCTGCCNCAACTCGAGAGGAANCCTGAGT	MBO_clone2	53	83	1.19e-06	0.000264	TCACCACCTCATCTCGACTGGATGCCTCACA
TCCCTGCCNCAACTCGAGAGGAANCCTGAGT	MBO_clone1	53	83	1.19e-06	0.000264	TCACCACCTCATCTCGACTGGATGCCTCACA
TCCCTGCCNCAACTCGAGAGGAANCCTGAGT	MAM_JU_clone2	53	83	1.19e-06	0.000325	TCACCACCTCATCTCGACTGGATGCCTCACA
TCCCTGCCNCAACTCGAGAGGAANCCTGAGT	MAM_RR_clone2	53	83	3.26e-05	0.00476	CCTCCGCCTCATTTCGATGGAATGCCTCACA
TCCCTGCCNCAACTCGAGAGGAANCCTGAGT	MGO_clone4	54	84	8.47e-06	0.00112	TCCCCGCTTCATCGAAACAGGATGCCTCACA
TCCCTGCCNCAACTCGAGAGGAANCCTGAGT	MGO_clone1	54	84	8.47e-06	0.00112	TCCCCGCTTCATCGAAACAGGATGCCTCACA
TCCCTGCCNCAACTCGAGAGGAANCCTGAGT	MGO_clone2	54	84	8.47e-06	0.00112	TCCCCGCTTCATCGAAACAGGATGCCTCACA
TCCCTGCCNCAACTCGAGAGGAANCCTGAGT	MGO_clone3	54	84	8.47e-06	0.00112	TCCCCGCTTCATCGAAACAGGATGCCTCACA
TCCCTGCCNCAACTCGAGAGGAANCCTGAGT	MNE_clone2	54	84	3.26e-05	0.00414	TCCCCGACTCCTTTCGACGGAATGCCTCACA
TCCCTGCCNCAACTCGAGAGGAANCCTGAGT	MNE_clone4	54	84	3.26e-05	0.00414	TCCCCGCTTCATCGAAACAGGATGCCCCACA
TCCCTGCCNCAACTCGAGAGGAANCCTGAGT	MNA_clone2	54	84	8.98e-08	3.86e-05	TCACCGCCTCATCTCGACGGGATGCCTGGTA
TCCCTGCCNCAACTCGAGAGGAANCCTGAGT	MNA_clone3	54	84	8.47e-06	0.00153	TCGCCCCTTCATCTCGAGGGGATGACTCACA
TCCCTGCCNCAACTCGAGAGGAANCCTGAGT	MNA_clone4	54	84	1.3e-05	0.00199	TCCCCGCCTCATTTCAAAAGTAGGTCTCACA
TCCCTGCCNCAACTCGAGAGGAANCCTGAGT	MNA_clone1	54	84	5.06e-05	0.00609	TCCCCGCTTCATCGAAACAGGATGCTTCACA
TCCCTGCCNCAACTCGAGAGGAANCCTGAGT	MBO_clone4	54	84	1.38e-07	5.01e-05	TGGCCGCCTCATCTCGACGGGATGCCTGATA
TCCCTGCCNCAACTCGAGAGGAANCCTGAGT	MBO_clone3	54	84	8.47e-06	0.00139	TCCCCGCTTCATCGAAACAGGATGCCTCACA
TCCCTGCCNCAACTCGAGAGGAANCCTGAGT	MAM_PR_clone4	54	84	8.47e-06	0.00131	TGGCCCCCTCATCTCGAGGGGATGACTCACA
TCCCTGCCNCAACTCGAGAGGAANCCTGAGT	MAM_PR_clone1	54	84	8.47e-06	0.00131	TCCCCGCTTCATCGAAACAGGATGCCTCACA
TCCCTGCCNCAACTCGAGAGGAANCCTGAGT	MAM_PR_clone3	54	84	8.47e-06	0.00131	TCCCCGCTTCATCGAAACAGGATGCCTCACA
TCCCTGCCNCAACTCGAGAGGAANCCTGAGT	MAM_SA_clone2	54	84	2.49e-07	0.000106	TCCCCGCCTCATTTCGACAGAAGGCCTCACA
TCCCTGCCNCAACTCGAGAGGAANCCTGAGT	MAM_SA_clone4	54	84	8.47e-06	0.00141	TGGCCCCCTCATCTCGAGGGGATGACTCACA
TCCCTGCCNCAACTCGAGAGGAANCCTGAGT	MAM_SA_clone1	54	84	8.47e-06	0.00141	TCCCCGCTTCATCGAAACAGGATGCCTCACA
TCCCTGCCNCAACTCGAGAGGAANCCTGAGT	MAM_SA_clone3	54	84	8.47e-06	0.00141	TGGCCCCCTCATCTCGAGGGGATGACTCACA
TCCCTGCCNCAACTCGAGAGGAANCCTGAGT	MAM_JU_clone1	54	84	1.38e-07	5.57e-05	TGGCCGCCTCATCTCGACGGGATGCCTGACA
TCCCTGCCNCAACTCGAGAGGAANCCTGAGT	MAM_JU_clone3	54	84	8.47e-06	0.00145	TCCCCGCTTCATCGAAACAGGATGCCTCACA
TCCCTGCCNCAACTCGAGAGGAANCCTGAGT	MAM_RR_clone1	54	84	8.47e-06	0.00142	TCCCCGCTTCATCAAAACAGGATGCCTCACA
TCCCTGCCNCAACTCGAGAGGAANCCTGAGT	MAM_RR_clone3	54	84	8.47e-06	0.00142	TCCCCGCTTCATCGAAACAGGATGCCTCACA
TCCCTGCCNCAACTCGAGAGGAANCCTGAGT	BDI_clone1	54	84	1.19e-06	0.000314	TCCCCGCCTCATCGAAACAGGATGCCTCACA
TCCCTGCCNCAACTCGAGAGGAANCCTGAGT	BDI_clone3	54	84	1.98e-06	0.000456	TTCCCACCTCATCTTGACAGGAGGCCTCACA
TCCCTGCCNCAACTCGAGAGGAANCCTGAGT	BDI_clone4	54	84	8.47e-06	0.0015	TCGCCACCTAATCTCGATGGGATGCCTCACA
TCCCTGCCNCAACTCGAGAGGAANCCTGAGT	BDI_clone2	54	84	1.3e-05	0.002	TCCCCACATCATTTCAAAAGGAGGCCTCAAA
TCCCTGCCNCAACTCGAGAGGAANCCTGAGT	OBE_clone4	54	84	1.38e-07	7.87e-05	TCGCCGCCTCATCTCGACGGGATGCCTCACA
TCCCTGCCNCAACTCGAGAGGAANCCTGAGT	OBE_clone1	54	84	1.38e-07	7.87e-05	TCGCCGCCTCATCTCGACGGGATGCCTCACA
TCCCTGCCNCAACTCGAGAGGAANCCTGAGT	OBE_clone3	54	84	1.19e-06	0.000338	TCCCCGCCTCATCGAAACAGGATGCCTCACA
TCCCTGCCNCAACTCGAGAGGAANCCTGAGT	OBE_clone2	54	84	2.32e-05	0.00305	TCCCCGCCTCATCGAAACAGGATGCCCCCAA
TCCCTGCCNCAACTCGAGAGGAANCCTGAGT	OVI_clone4	54	84	1.19e-06	0.000322	TCCCCGCCTCATTTCGATGGAATGCCTCACA
TCCCTGCCNCAACTCGAGAGGAANCCTGAGT	OVI_clone3	54	84	1.19e-06	0.000322	TCCCCGCCTCATTTCGACGGAATGCCTCACA
TCCCTGCCNCAACTCGAGAGGAANCCTGAGT	OVI_clone2	54	84	1.19e-06	0.000322	TCCCCGCCTCATTTCGACGGAATGCCTCACA
TCCCTGCCNCAACTCGAGAGGAANCCTGAGT	OVI_clone1	54	84	1.19e-06	0.000322	TGGCCGCCTCAGCTCGACGGGATGCCTCACA
TCCCTGCCNCAACTCGAGAGGAANCCTGAGT	MNE_clone1	84	114	1.3e-05	0.00205	TGCATTTGACACCTTGAGCGGCACACAGAGT
TCCCTGCCNCAACTCGAGAGGAANCCTGAGT	MBO_clone1	84	114	6.39e-08	2.65e-05	TCCCTTTGACAATGCGAAAGAAACCCCGAGT
TCCCTGCCNCAACTCGAGAGGAANCCTGAGT	MBO_clone2	84	114	5.06e-07	0.000126	TCCCTTTGACAATGCGAAAGAAACCCCAAGT
TCCCTGCCNCAACTCGAGAGGAANCCTGAGT	MAM_JU_clone2	84	114	6.39e-08	3.13e-05	TCCCTTTGACAATGCGAAAGAAACCCCGAGT
TCCCTGCCNCAACTCGAGAGGAANCCTGAGT	MAM_JU_clone4	84	114	1.98e-06	0.000439	TGCATTTGACACCTCGAGCGGCACACAGAGT
TCCCTGCCNCAACTCGAGAGGAANCCTGAGT	MAM_RR_clone4	84	114	2.49e-07	7.97e-05	TGCCTTTGACACCTCGAGAGGCACGCAGAGA
TCCCTGCCNCAACTCGAGAGGAANCCTGAGT	MAM_RR_clone2	84	114	3.95e-07	0.000111	TGTCTTTGACACCTCGAGAGGCACGCAGAGT
TCCCTGCCNCAACTCGAGAGGAANCCTGAGT	OBE_clone2	84	114	1.37e-05	0.00204	ATCCTTTTGACACTGCAGAGGAACGCGGAGT
TCCCTGCCNCAACTCGAGAGGAANCCTGAGT	MGO_clone1	85	115	7.36e-08	2.03e-05	TCCTTTTGACAACTGCAGAGGAACGCGGAGT
TCCCTGCCNCAACTCGAGAGGAANCCTGAGT	MGO_clone2	85	115	7.36e-08	2.03e-05	TCCTTTTGACAACTGCAGAGGAACGCGGAGT
TCCCTGCCNCAACTCGAGAGGAANCCTGAGT	MGO_clone3	85	115	7.36e-08	2.03e-05	TCCTTTTGACAACTGCAGAGGAACGCGGAGT
TCCCTGCCNCAACTCGAGAGGAANCCTGAGT	MGO_clone4	85	115	5.53e-07	0.000102	TCCTTTTGACAACTGCAGAGGAACGCGAAGT
TCCCTGCCNCAACTCGAGAGGAANCCTGAGT	MNE_clone3	85	115	2.53e-08	1.79e-05	TTCCTTTGACACCTCGAGCGGCACCCAGAGT
TCCCTGCCNCAACTCGAGAGGAANCCTGAGT	MNE_clone4	85	115	5.53e-07	0.000159	TCCTTTTGACAACTGCAGAGGAACGTGGAGT
TCCCTGCCNCAACTCGAGAGGAANCCTGAGT	MNE_clone2	85	115	1.98e-06	0.000504	TGCCTCTGACACCTCAAGCGGCACACAGAGT
TCCCTGCCNCAACTCGAGAGGAANCCTGAGT	MNA_clone4	85	115	6.65e-09	7.9e-06	TCCCTTTGACAACTCGAGAAGATGGCAGAGT
TCCCTGCCNCAACTCGAGAGGAANCCTGAGT	MNA_clone3	85	115	4.52e-08	2.58e-05	TCCCTTTGACTATGCGAAAGGAACCCCGAGT
TCCCTGCCNCAACTCGAGAGGAANCCTGAGT	MNA_clone1	85	115	7.36e-08	3.38e-05	TCCTTTTGACAACTGCAGAGGAACGCGGAGT
TCCCTGCCNCAACTCGAGAGGAANCCTGAGT	MNA_clone2	85	115	3.95e-07	0.000124	TTGCTTTGACAGCGCGAAAGGAACCCAGAGT
TCCCTGCCNCAACTCGAGAGGAANCCTGAGT	MBO_clone4	85	115	6.39e-08	2.65e-05	CCCCTTTGAAAACGTGAAAGGAACCCTGAGT
TCCCTGCCNCAACTCGAGAGGAANCCTGAGT	MBO_clone3	85	115	7.36e-08	2.82e-05	TCCTTTTGACAACTGCAGAGGAACGCGGAGT
TCCCTGCCNCAACTCGAGAGGAANCCTGAGT	MAM_PR_clone4	85	115	4.52e-08	2.32e-05	TCCCTTTGACTATGCGAAAGGAACCCCGAGT
TCCCTGCCNCAACTCGAGAGGAANCCTGAGT	MAM_PR_clone3	85	115	7.36e-08	2.89e-05	TCCTTTTGACAACTGCAGAGGAACGCGGAGT
TCCCTGCCNCAACTCGAGAGGAANCCTGAGT	MAM_PR_clone1	85	115	7.36e-08	2.89e-05	TCCTTTTGACAACTGCAGAGGAACGCGGAGT
TCCCTGCCNCAACTCGAGAGGAANCCTGAGT	MAM_PR_clone2	85	115	1.3e-05	0.00185	TGCCTTTGACACCTTGAGCGCCACGCAGAGT
TCCCTGCCNCAACTCGAGAGGAANCCTGAGT	MAM_SA_clone3	85	115	4.52e-08	3.33e-05	TCCCTTTGACTATGCGAAAGGAACCCCGAGT
TCCCTGCCNCAACTCGAGAGGAANCCTGAGT	MAM_SA_clone4	85	115	4.52e-08	3.33e-05	TCCCTTTGACTATGCGAAAGGAACCCCGAGT
TCCCTGCCNCAACTCGAGAGGAANCCTGAGT	MAM_SA_clone1	85	115	5.06e-07	0.000144	TCCTTTTGACAACTGCAGAGGAACGCAGGGT
TCCCTGCCNCAACTCGAGAGGAANCCTGAGT	MAM_SA_clone2	85	115	1.83e-05	0.00261	TTTCTTTTATACCTCGAGAGGCAAGTGGAGT
TCCCTGCCNCAACTCGAGAGGAANCCTGAGT	MAM_JU_clone1	85	115	6.65e-09	1.14e-05	CCCCTTTGACAACGTGAAAGGAACCCTGAGT
TCCCTGCCNCAACTCGAGAGGAANCCTGAGT	MAM_JU_clone3	85	115	7.36e-08	3.36e-05	TCCTTTTGACAACTGCAGAGGAACGCGGAGT
TCCCTGCCNCAACTCGAGAGGAANCCTGAGT	MAM_RR_clone1	85	115	8.23e-09	1.38e-05	TCCTTTCGACAACTGCAGAGGAACGCGGAGT
TCCCTGCCNCAACTCGAGAGGAANCCTGAGT	MAM_RR_clone3	85	115	7.36e-08	2.91e-05	TCCTTTTGACAACTGCAGAGGAACGCGGAGT
TCCCTGCCNCAACTCGAGAGGAANCCTGAGT	BDI_clone2	85	115	5.53e-10	3.81e-06	TCCCTTTGACAACTCGAGAGGATGGCAGAGT
TCCCTGCCNCAACTCGAGAGGAANCCTGAGT	BDI_clone4	85	115	6.39e-08	2.59e-05	TCCCTTTGACAATGCGAAAGGAACCCCAAGT
TCCCTGCCNCAACTCGAGAGGAANCCTGAGT	BDI_clone3	85	115	7.36e-08	2.67e-05	TCCCTTTGACAACTCAAGAGAAACGTGGAGT
TCCCTGCCNCAACTCGAGAGGAANCCTGAGT	BDI_clone1	85	115	7.36e-08	2.67e-05	TCCTTTTAACAACTGCAGAGGAACACGGAGT
TCCCTGCCNCAACTCGAGAGGAANCCTGAGT	OBE_clone1	85	115	5.53e-10	1.89e-06	TCCCTTTGACAACGCGAAAGGAACCCCGAGT
TCCCTGCCNCAACTCGAGAGGAANCCTGAGT	OBE_clone4	85	115	6.65e-09	1.14e-05	TCCCTTTGACAACACGAAAGCAACCCCGAGT
TCCCTGCCNCAACTCGAGAGGAANCCTGAGT	OBE_clone3	85	115	7.36e-08	5.03e-05	TCCTTTTGACAACTGCAGAGGAACGCGGAGT
TCCCTGCCNCAACTCGAGAGGAANCCTGAGT	OVI_clone4	85	115	4.14e-09	9.36e-06	TCCCTTTGACACCTCGAGAGGCACGCGGAGT
TCCCTGCCNCAACTCGAGAGGAANCCTGAGT	OVI_clone1	85	115	3.95e-07	0.000134	TCCCTTTGACAGCGCAAAAGAAACCCCGAGT
TCCCTGCCNCAACTCGAGAGGAANCCTGAGT	OVI_clone2	85	115	1.3e-05	0.00177	TCCTTTTGTCTCTTCGAGAGACACGCGGAGT
TCCCTGCCNCAACTCGAGAGGAANCCTGAGT	OVI_clone3	85	115	1.3e-05	0.00177	TCCTTTTGTCTCTTCGAGAGACACGCGGAGT
TCCCTGCCNCAACTCGAGAGGAANCCTGAGT	MNE_clone1	115	145	3.95e-07	0.000118	TCACTGCTTCAAAACGTGACGATGTCTGACT
TCCCTGCCNCAACTCGAGAGGAANCCTGAGT	MAM_JU_clone4	115	145	2.83e-06	0.000606	TCACTGCTTGAAAAGGTGACGATGCCTGACT
TCCCTGCCNCAACTCGAGAGGAANCCTGAGT	MAM_RR_clone2	115	145	1.3e-05	0.00195	TCATTGCATCCAAAAGTGACGATGCCTGACT
TCCCTGCCNCAACTCGAGAGGAANCCTGAGT	MAM_RR_clone4	115	145	7.14e-05	0.00801	TAACTGCTTCAAAGGGTGACAATGCCTGACA
TCCCTGCCNCAACTCGAGAGGAANCCTGAGT	MNE_clone2	116	146	3.95e-07	0.000118	TCACTGCTTCAAAAGGGGACGATGCCTGACT
TCCCTGCCNCAACTCGAGAGGAANCCTGAGT	MNE_clone3	116	146	2.83e-06	0.000667	TCTCTGCTTTAAAAGGTGACGATGCCTGACT
TCCCTGCCNCAACTCGAGAGGAANCCTGAGT	MNA_clone3	116	146	5.4e-07	0.000155	TCAATGTTTCAAAAGGAGATGATACCTGAGT
TCCCTGCCNCAACTCGAGAGGAANCCTGAGT	MAM_PR_clone2	116	146	4.52e-08	2.32e-05	TCACTGCTTCAAAAGGTGAGGATGCCTGACT
TCCCTGCCNCAACTCGAGAGGAANCCTGAGT	MAM_PR_clone4	116	146	5.06e-07	0.000135	TCAATGTTTCAAAAGGAGATGATGCCTGAGT
TCCCTGCCNCAACTCGAGAGGAANCCTGAGT	MAM_SA_clone2	116	146	3.95e-07	0.000142	TCACTGCTTCCAAAAGTGACGAAGCCTGACT
TCCCTGCCNCAACTCGAGAGGAANCCTGAGT	MAM_SA_clone4	116	146	5.06e-07	0.000144	TCAATGTTTCAAAAGGAGATGATGCCTGAGT
TCCCTGCCNCAACTCGAGAGGAANCCTGAGT	MAM_SA_clone3	116	146	5.06e-07	0.000144	TCAATGTTTCAAAAGGAGATGATGCCTGAGT
TCCCTGCCNCAACTCGAGAGGAANCCTGAGT	BDI_clone3	116	146	6.39e-08	2.59e-05	TCAATGCTTCAACAGGAGACGATGCCTGAAT
TCCCTGCCNCAACTCGAGAGGAANCCTGAGT	BDI_clone1	116	146	1.83e-05	0.00238	TCAATGCTTCAAAAGGAGACGATATCTGCCT
TCCCTGCCNCAACTCGAGAGGAANCCTGAGT	OBE_clone3	116	146	8.62e-05	0.00831	TCAATGCTTCAAAAGGAGACGATGTCTCCCT
TCCCTGCCNCAACTCGAGAGGAANCCTGAGT	OVI_clone4	116	146	3.95e-07	0.000134	TCACTGCTTCAAAAGGTGACGATGCCTGACT
TCCCTGCCNCAACTCGAGAGGAANCCTGAGT	OVI_clone2	116	146	3.95e-07	0.000134	TCACTGCTTCAAAAGGTGACGATGCCTGACT
TCCCTGCCNCAACTCGAGAGGAANCCTGAGT	OVI_clone3	116	146	3.95e-07	0.000134	TCACTGCTTCAAAAGGTGACGATGCCTGACT
TCCCTGCCNCAACTCGAGAGGAANCCTGAGT	MBO_clone1	124	154	5.06e-07	0.000126	TCAATGTTTCAAGAGGAGACGATGCCTGAGT
TCCCTGCCNCAACTCGAGAGGAANCCTGAGT	MBO_clone2	124	154	5.06e-07	0.000126	TCAATGTTTCAAGAGGAGACGATGCCTGAGT
TCCCTGCCNCAACTCGAGAGGAANCCTGAGT	MAM_JU_clone2	124	154	5.06e-07	0.000158	TCAATGTTTCAAGAGGAGACGATGCCTGAGT
TCCCTGCCNCAACTCGAGAGGAANCCTGAGT	MNA_clone4	125	155	2.83e-06	0.000629	TCAATGCTTCAAAAGGCGATGATGCCTGACT
TCCCTGCCNCAACTCGAGAGGAANCCTGAGT	MNA_clone2	125	155	1.3e-05	0.00199	TCAATGTTTCTACAGGACATGTTGCCTGAGT
TCCCTGCCNCAACTCGAGAGGAANCCTGAGT	MBO_clone4	125	155	1.83e-05	0.00243	TCAATGTTTCACAAGGAGACGATTCCTGAAT
TCCCTGCCNCAACTCGAGAGGAANCCTGAGT	MAM_JU_clone1	125	155	1.83e-05	0.00261	TCAATGTTTCACAAGGAGACGATTCCTGAAT
TCCCTGCCNCAACTCGAGAGGAANCCTGAGT	BDI_clone2	125	155	5.4e-07	0.000177	TCAATGCTTCAAAAGGAGATGATACCTGACT
TCCCTGCCNCAACTCGAGAGGAANCCTGAGT	OBE_clone4	125	155	7.14e-05	0.00708	TCAAAGTTTCACAAGGAGAAAATGCCTGAGT
TCCCTGCCNCAACTCGAGAGGAANCCTGAGT	OBE_clone1	125	155	7.14e-05	0.00708	TCAAAGTTTCACAAGGAGAAAATGCCTGAGT
TCCCTGCCNCAACTCGAGAGGAANCCTGAGT	OVI_clone1	125	155	1.7e-05	0.00206	TCAATGTTTCACAAGGAGACGATGCTTGAGT
TCCCTGCCNCAACTCGAGAGGAANCCTGAGT	MGO_clone3	175	205	2.55e-09	5.62e-06	TCCCTGTGGCAACTGGGAAGGGAGCCTGGGT
TCCCTGCCNCAACTCGAGAGGAANCCTGAGT	MGO_clone4	175	205	2.98e-08	1.26e-05	TCCCTGTGGCAACTGGGAAGGGAGCCTGGAT
TCCCTGCCNCAACTCGAGAGGAANCCTGAGT	MGO_clone1	175	205	2.98e-08	1.26e-05	TCCCTGTGGCAACTGGGAAGGGAGCCTGGAT
TCCCTGCCNCAACTCGAGAGGAANCCTGAGT	MGO_clone2	175	205	2.98e-08	1.26e-05	TCCCTGTGGCAACTGGGAAGGGAGCCTGGAT
TCCCTGCCNCAACTCGAGAGGAANCCTGAGT	MNE_clone1	175	205	1.64e-08	1.69e-05	TCCCTGTGGCTACTGGTAAGGGACCCTGGGT
TCCCTGCCNCAACTCGAGAGGAANCCTGAGT	MNE_clone4	175	205	2.98e-08	1.79e-05	TCCCTGTGGCAACTGGGAAGGGAGCCTGGAT
TCCCTGCCNCAACTCGAGAGGAANCCTGAGT	MNA_clone1	175	205	2.98e-08	2.28e-05	TCCCTGTGGCAACTGGGAAGGGAGCCTGGAT
TCCCTGCCNCAACTCGAGAGGAANCCTGAGT	MBO_clone3	175	205	2.98e-08	1.71e-05	TCCCTGTGGCAACTGGGAAGGGAGCCTGGAT
TCCCTGCCNCAACTCGAGAGGAANCCTGAGT	MAM_PR_clone3	175	205	2.98e-08	1.99e-05	TCCCTGTGGCAACTGGGAAGGGAGCCTGGAT
TCCCTGCCNCAACTCGAGAGGAANCCTGAGT	MAM_PR_clone1	175	205	2.98e-08	1.99e-05	TCCCTGTGGCAACTGGGAAGGGAGCCTGGAT
TCCCTGCCNCAACTCGAGAGGAANCCTGAGT	MAM_SA_clone1	175	205	2.98e-08	3.33e-05	TCCCTGTGGCAACTGGGAAGGGAGCCTGGAT
TCCCTGCCNCAACTCGAGAGGAANCCTGAGT	MAM_JU_clone4	175	205	2.53e-08	2.04e-05	ACCCTGTATCTACTGGAAAGGGACCCTGGGT
TCCCTGCCNCAACTCGAGAGGAANCCTGAGT	MAM_JU_clone3	175	205	2.98e-08	2.04e-05	TCCCTGTGGCAACTGGGAAGGGAGCCTGGAT
TCCCTGCCNCAACTCGAGAGGAANCCTGAGT	MAM_RR_clone3	175	205	2.98e-08	1.82e-05	TCCCTGTGGCAACTGGGAAGGGAGCCTGGAT
TCCCTGCCNCAACTCGAGAGGAANCCTGAGT	MAM_RR_clone1	175	205	2.98e-08	1.82e-05	TCCCTGTGGCAACTGGGAAGGGAGCCTGGAT
TCCCTGCCNCAACTCGAGAGGAANCCTGAGT	MAM_RR_clone2	175	205	9.46e-06	0.00155	TTTTTGTGGCTACTGGAAAGGGACCCCGTGT
TCCCTGCCNCAACTCGAGAGGAANCCTGAGT	OBE_clone2	175	205	2.55e-09	5.8e-06	TCCCTGTGGCCACTGGAAAGGGAGCCTGGGT
TCCCTGCCNCAACTCGAGAGGAANCCTGAGT	MNE_clone2	176	206	1.64e-08	1.69e-05	TCCCTGTGGCTACTGGTAAGGGACCCTGGGT
TCCCTGCCNCAACTCGAGAGGAANCCTGAGT	MNE_clone3	176	206	1.65e-07	6.04e-05	TCCCTGTGGCTTCTGCAAAGGGACCCTGGGT
TCCCTGCCNCAACTCGAGAGGAANCCTGAGT	MNA_clone3	176	206	5.53e-10	3.81e-06	TCCCTGTGGCAACTGGAAAGGGAACCTGGGT
TCCCTGCCNCAACTCGAGAGGAANCCTGAGT	MAM_PR_clone4	176	206	5.53e-10	3.69e-06	TCCCTGTGGCAACTGGAAAGGGAACCTGGGT
TCCCTGCCNCAACTCGAGAGGAANCCTGAGT	MAM_PR_clone2	176	206	1.65e-07	5.24e-05	TCCCTTTGGCTACTGGAAAGGGGCCCTGGGT
TCCCTGCCNCAACTCGAGAGGAANCCTGAGT	MAM_SA_clone3	176	206	5.53e-10	1.89e-06	TCCCTGTGGCAACTGGAAAGGGAACCTGGGT
TCCCTGCCNCAACTCGAGAGGAANCCTGAGT	MAM_SA_clone4	176	206	5.53e-10	1.89e-06	TCCCTGTGGCAACTGGAAAGGGAACCTGGGT
TCCCTGCCNCAACTCGAGAGGAANCCTGAGT	MAM_SA_clone2	176	206	2.83e-06	0.000587	TTTCTCTGGCTACTGGAAAGGGATCCTGCGT
TCCCTGCCNCAACTCGAGAGGAANCCTGAGT	BDI_clone1	176	206	2.98e-08	2.57e-05	TCACTGTGGCAACTGGGAAGGGAGCCTGGGT
TCCCTGCCNCAACTCGAGAGGAANCCTGAGT	BDI_clone3	176	206	6.39e-08	2.59e-05	TCCCTGTGGCAACTAGAAAGGGAAACTGGCT
TCCCTGCCNCAACTCGAGAGGAANCCTGAGT	OBE_clone3	176	206	3.51e-10	1.89e-06	TCCCTGTGGCAACTGGAAAGGGAGCCTGGGT
TCCCTGCCNCAACTCGAGAGGAANCCTGAGT	OVI_clone3	176	206	2.98e-08	2.52e-05	TCCCTGTGGCTACTGGAAAGGGACACTGGGT
TCCCTGCCNCAACTCGAGAGGAANCCTGAGT	OVI_clone2	176	206	2.98e-08	2.52e-05	TCCCTGTGGCTACTGGAAAGGGACACTGGGT
TCCCTGCCNCAACTCGAGAGGAANCCTGAGT	OVI_clone4	176	206	2.98e-08	2.52e-05	TCCCTGTTGCAACAAGAAAGGGACACTGGGT
TCCCTGCCNCAACTCGAGAGGAANCCTGAGT	MBO_clone1	184	214	3.54e-11	1.22e-07	TCCCTGTGGCAACTGGAGAGGGAACCTGGGT
TCCCTGCCNCAACTCGAGAGGAANCCTGAGT	MBO_clone2	184	214	2.98e-08	1.71e-05	TCCCTGTGGCAACTGGGAAGGGAGCCTGGAT
TCCCTGCCNCAACTCGAGAGGAANCCTGAGT	MAM_JU_clone2	184	214	3.54e-11	2.43e-07	TCCCTGTCGCAACTGGAAAGGGAACCTGGGT
TCCCTGCCNCAACTCGAGAGGAANCCTGAGT	BDI_clone4	184	214	6.65e-09	1.19e-05	TCCCTGTGGAAACTGGAAAGGGAACCTGGGT
TCCCTGCCNCAACTCGAGAGGAANCCTGAGT	OVI_clone1	184	214	1.52e-05	0.00195	ATCGCTTTACAACTGGAAAGGGAACCTGGGT
TCCCTGCCNCAACTCGAGAGGAANCCTGAGT	MNA_clone2	185	215	6.65e-09	7.9e-06	TACCTGTGGCAACTGGAAAGGGAACCTGGGT
TCCCTGCCNCAACTCGAGAGGAANCCTGAGT	MNA_clone4	185	215	1.72e-05	0.00242	TACCTGTGGCAACTGGAAAGAGACACTACTT
TCCCTGCCNCAACTCGAGAGGAANCCTGAGT	MBO_clone4	185	215	3.54e-11	1.22e-07	TCCCTGTGGCAACTGGAGAGGGAACCTGGGT
TCCCTGCCNCAACTCGAGAGGAANCCTGAGT	MAM_JU_clone1	185	215	5.53e-10	1.89e-06	TCACTGTCGCAACTGGAAAGGGAACCTGGGT
TCCCTGCCNCAACTCGAGAGGAANCCTGAGT	BDI_clone2	185	215	9.25e-05	0.00966	TACCTGTGCCAACTGGAAATAGATACTAGTT
TCCCTGCCNCAACTCGAGAGGAANCCTGAGT	OBE_clone4	185	215	3.95e-07	0.000149	TCACTGTGGCAATTGGTAAGGGAACCTGGGT
TCCCTGCCNCAACTCGAGAGGAANCCTGAGT	OBE_clone1	185	215	3.95e-07	0.000149	TCACTGTGGCAATTGGTAAGGGAACCTGGGT
TCCCTGCCNCAACTCGAGAGGAANCCTGAGT	MGO_clone3	206	236	1.8e-08	1.26e-05	CTCCTGCCTCACCTCGAGAGGTGTCCATATT
TCCCTGCCNCAACTCGAGAGGAANCCTGAGT	MGO_clone1	206	236	1.8e-08	1.26e-05	CTCCTGCCTCACCTCGAGAGGTGTCCGTATT
TCCCTGCCNCAACTCGAGAGGAANCCTGAGT	MGO_clone4	206	236	1.8e-08	1.26e-05	CTCCTGCCTCACCTCGAGAGGTGTCCGTATT
TCCCTGCCNCAACTCGAGAGGAANCCTGAGT	MGO_clone2	206	236	1.8e-08	1.26e-05	CTCCTGCCTCACCTCGAGAGGTGTCCGTATT
TCCCTGCCNCAACTCGAGAGGAANCCTGAGT	MNE_clone4	206	236	1.8e-08	1.69e-05	CTCCTGCCTCACCTCGAGAGGTGTCCGTATT
TCCCTGCCNCAACTCGAGAGGAANCCTGAGT	MNE_clone1	206	236	2.68e-05	0.00353	CTCCCGCTTCACCTCGAGAAGCATCCCTTTG
TCCCTGCCNCAACTCGAGAGGAANCCTGAGT	MNA_clone1	206	236	1.8e-08	1.77e-05	CTCCTGCCTCACCTCGAGAGGTGTCCGTATT
TCCCTGCCNCAACTCGAGAGGAANCCTGAGT	MBO_clone3	206	236	1.8e-08	1.71e-05	CTCCTGCCTCACCTCGAGAGGTGTCCGTATT
TCCCTGCCNCAACTCGAGAGGAANCCTGAGT	MAM_PR_clone3	206	236	1.8e-08	1.5e-05	CTCCTGCCTCACCTCGAGAGGTGTCCGTATT
TCCCTGCCNCAACTCGAGAGGAANCCTGAGT	MAM_PR_clone1	206	236	1.8e-08	1.5e-05	CTCCTGCCTCACCTCGAGAGGTGTCCGTATT
TCCCTGCCNCAACTCGAGAGGAANCCTGAGT	MAM_SA_clone1	206	236	1.8e-08	2.46e-05	CTCCTGCCTCACCTCGAGAGGTGTCCGTATT
TCCCTGCCNCAACTCGAGAGGAANCCTGAGT	MAM_JU_clone3	206	236	1.8e-08	2.04e-05	CTCCTGCCTCACCTCGAGAGGTGTCCGTATT
TCCCTGCCNCAACTCGAGAGGAANCCTGAGT	MAM_RR_clone1	206	236	1.8e-08	1.73e-05	CTCCTGCCTCACCTCGAGAGGTGTCCGTATT
TCCCTGCCNCAACTCGAGAGGAANCCTGAGT	MAM_RR_clone3	206	236	1.84e-07	6.5e-05	CTCCTGCCTCACCTCGAGAGGTGTTCGTATT
TCCCTGCCNCAACTCGAGAGGAANCCTGAGT	MAM_RR_clone2	206	236	4.43e-06	0.000851	CTCCCGCCTCACCTCGAGAAGCGTCCGTTTT
TCCCTGCCNCAACTCGAGAGGAANCCTGAGT	OBE_clone2	206	236	4.03e-05	0.0046	CTCCTGTCTCACCTCCAGAGGTGTATCGTAT
TCCCTGCCNCAACTCGAGAGGAANCCTGAGT	MNE_clone2	207	237	2.68e-05	0.00353	CTCCTGCTTCACCTCGAGAAGCGTCCCTTTG
TCCCTGCCNCAACTCGAGAGGAANCCTGAGT	MNA_clone3	207	237	1.06e-05	0.0017	CTCATGCCTCACCTTGAGAGGCGTTCCTAAT
TCCCTGCCNCAACTCGAGAGGAANCCTGAGT	MAM_PR_clone4	207	237	1.06e-05	0.00157	CTCATGCCTCACCTTGAGAGGCGTTCCTAAT
TCCCTGCCNCAACTCGAGAGGAANCCTGAGT	MAM_SA_clone4	207	237	1.06e-05	0.00161	CTCATGCCTCACCTTGAGAGGCGTTCCTAAT
TCCCTGCCNCAACTCGAGAGGAANCCTGAGT	MAM_SA_clone3	207	237	1.06e-05	0.00161	CTCATGCCTCACCTTGAGAGGCGTTCCTAAT
TCCCTGCCNCAACTCGAGAGGAANCCTGAGT	BDI_clone1	207	237	1.8e-08	2.07e-05	CTCCTGCCTCACCTCGAGAGGTGTCCATATT
TCCCTGCCNCAACTCGAGAGGAANCCTGAGT	BDI_clone3	207	237	6.57e-06	0.00122	CTCCCGCCTTACCTCGAGAGGCGTGCCTATT
TCCCTGCCNCAACTCGAGAGGAANCCTGAGT	OBE_clone3	207	237	1.06e-05	0.00165	CTCCTGTCTCACCTCAAGAGGTGTTCGTATT
TCCCTGCCNCAACTCGAGAGGAANCCTGAGT	OVI_clone4	207	237	2.42e-06	0.00047	CTCCTGACTCACCTCTAGAAGCGTCCTTATT
TCCCTGCCNCAACTCGAGAGGAANCCTGAGT	OVI_clone2	207	237	4.43e-06	0.000791	CTCCCGCCTCAGCTCGAGAAGCGTCCGTTTT
TCCCTGCCNCAACTCGAGAGGAANCCTGAGT	OVI_clone3	207	237	4.43e-06	0.000791	CTCCCGCCTCAGCTCGAGAAGCGTCCGTTTT
TCCCTGCCNCAACTCGAGAGGAANCCTGAGT	MBO_clone2	215	245	1.8e-08	1.71e-05	CTCCTGCCTCACCTCGAGAGGTGTCCGTATT
TCCCTGCCNCAACTCGAGAGGAANCCTGAGT	MBO_clone1	215	245	9.1e-07	0.000216	CTCACGCCTCACCTCGAGAGGCGTCCCTAAT
TCCCTGCCNCAACTCGAGAGGAANCCTGAGT	MAM_JU_clone2	215	245	4.43e-06	0.000867	CTCACGCCTCACCTCGAGAGGCGTCCCTAAC
TCCCTGCCNCAACTCGAGAGGAANCCTGAGT	BDI_clone4	215	245	6.57e-06	0.00122	CTCAAGCCTCACCTCGAGAGGCGTTCCTAAT
TCCCTGCCNCAACTCGAGAGGAANCCTGAGT	MNA_clone2	216	246	1.84e-07	7.03e-05	CTCACGCCTCACCTCGAGAGGCATCCCTAAT
TCCCTGCCNCAACTCGAGAGGAANCCTGAGT	MNA_clone4	216	246	9.1e-07	0.000241	TTCCCGCCTGACCACGAGAGGAGTCCCTATG
TCCCTGCCNCAACTCGAGAGGAANCCTGAGT	MBO_clone4	216	246	4.43e-06	0.000804	CTCACGCCTCACCTCGAGAGGCGTCCCTAAC
TCCCTGCCNCAACTCGAGAGGAANCCTGAGT	MAM_JU_clone1	216	246	4.43e-06	0.000867	CTCACGCCTCACCTCGAGAGGCGTCCCTAAC
TCCCTGCCNCAACTCGAGAGGAANCCTGAGT	BDI_clone2	216	246	9.1e-07	0.000261	CTCCCGCCTGACCTCGAGAGGAGTCCCTATG
TCCCTGCCNCAACTCGAGAGGAANCCTGAGT	OBE_clone4	216	246	9.1e-07	0.00027	CTCACGCCTCACCTCGAGAGGCGTCCCTAAT
TCCCTGCCNCAACTCGAGAGGAANCCTGAGT	OBE_clone1	216	246	9.1e-07	0.00027	CTCACGCCTCACCTCGAGAGGTGTCCCTAAT
TCCCTGCCNCAACTCGAGAGGAANCCTGAGT	MAM_RR_clone4	235	265	9.1e-07	0.000218	GCCCTGCCAAGCCTCGAAGAGATTACTGAGG
TCCCTGCCNCAACTCGAGAGGAANCCTGAGT	MAM_RR_clone2	236	266	1.06e-05	0.00166	TGCCTCCCAAGCCTCGAAGAGATTCTTGAGG
TCCCTGCCNCAACTCGAGAGGAANCCTGAGT	MGO_clone2	237	267	1.43e-09	4.75e-06	GCCCTGCCAAGCCTCGAGGAGAATCCTGAGG
TCCCTGCCNCAACTCGAGAGGAANCCTGAGT	MGO_clone4	237	267	1.43e-09	4.75e-06	GCCCTGCCAAGCCTCGAGGAGAATCCTGAGG
TCCCTGCCNCAACTCGAGAGGAANCCTGAGT	MGO_clone1	237	267	1.09e-08	1.26e-05	GCCCCGCCAAGCCTCGAGGAGAATCCTGAGG
TCCCTGCCNCAACTCGAGAGGAANCCTGAGT	MGO_clone3	237	267	1.07e-07	2.84e-05	GCCCTGCCAAGCCTCGAGGAGAATCCCAAGG
TCCCTGCCNCAACTCGAGAGGAANCCTGAGT	MNE_clone4	237	267	1.43e-09	4.73e-06	GCCCTGCCAAGCCTCGAGGAGAATCCTGAGG
TCCCTGCCNCAACTCGAGAGGAANCCTGAGT	MNE_clone1	237	267	2.68e-05	0.00353	GCCCTGTCAGGCCACGAATAGATTCCTGACG
TCCCTGCCNCAACTCGAGAGGAANCCTGAGT	MNA_clone1	237	267	1.43e-09	4.94e-06	GCCCTGCCAAGCCTCGAGGAGAATCCTGAGG
TCCCTGCCNCAACTCGAGAGGAANCCTGAGT	MBO_clone3	237	267	1.43e-09	2.47e-06	GCCCTGCCAAGCCTCGAGGAGAATCCTGAGG
TCCCTGCCNCAACTCGAGAGGAANCCTGAGT	MAM_PR_clone3	237	267	1.43e-09	4.54e-06	GCCCTGCCAAGCCTCGAGGAGAATCCTGAGG
TCCCTGCCNCAACTCGAGAGGAANCCTGAGT	MAM_PR_clone1	237	267	1.8e-08	1.5e-05	GCCCTGCCAAGCCTCGAGGAGAATTCTGAGG
TCCCTGCCNCAACTCGAGAGGAANCCTGAGT	MAM_SA_clone1	237	267	1.43e-09	3.27e-06	GCCCTGCCAAGCCTCGAGGAGAATCCTGAGG
TCCCTGCCNCAACTCGAGAGGAANCCTGAGT	MAM_SA_clone2	237	267	9.1e-07	0.000239	TGCCTGCCAAGCCTCGCAGAGATTCCTGAGG
TCCCTGCCNCAACTCGAGAGGAANCCTGAGT	MAM_JU_clone3	237	267	1.8e-08	2.04e-05	GCCCTACCAAGCCTCGAGGAGAATCCTGAGG
TCCCTGCCNCAACTCGAGAGGAANCCTGAGT	MAM_JU_clone4	237	267	4.03e-05	0.00503	GCCCTGGCAAGCCTCGAAGATATTACTGAGG
TCCCTGCCNCAACTCGAGAGGAANCCTGAGT	MAM_RR_clone1	237	267	1.8e-08	1.73e-05	GCCCTGCCAAGCCTCGAGGAGAATCCTAAGG
TCCCTGCCNCAACTCGAGAGGAANCCTGAGT	MAM_RR_clone3	237	267	1.8e-08	1.73e-05	GCCCTGCCAAGCCTCGAGGAGAATTCTGAGG
TCCCTGCCNCAACTCGAGAGGAANCCTGAGT	MNE_clone3	238	268	6.43e-07	0.000177	GCCCTGCCAAGCCTCGAAGAGATTCCGGAGG
TCCCTGCCNCAACTCGAGAGGAANCCTGAGT	MNE_clone2	238	268	2.68e-05	0.00353	GCCCTGTCAGGCCACGAAGAGATTCCTGACG
TCCCTGCCNCAACTCGAGAGGAANCCTGAGT	MNA_clone3	238	268	9.1e-07	0.000241	ACCCTGCCAAGCGTCGAGGAGAATACCGAGG
TCCCTGCCNCAACTCGAGAGGAANCCTGAGT	MAM_PR_clone2	238	268	1.07e-07	3.97e-05	GCCCTGCCAAGCCTCGAAGAGATACCTGAGG
TCCCTGCCNCAACTCGAGAGGAANCCTGAGT	MAM_PR_clone4	238	268	6.57e-06	0.00112	ACCCTGCCAAGCATCGAGGAGAATACCGACG
TCCCTGCCNCAACTCGAGAGGAANCCTGAGT	MAM_SA_clone3	238	268	9.1e-07	0.000239	ACCCTGCCAAGCGTCGAGGAGAATACCGAGG
TCCCTGCCNCAACTCGAGAGGAANCCTGAGT	MAM_SA_clone4	238	268	6.57e-06	0.00125	ACCCTGCCAAGCGTCGAGGAGAATACCGACG
TCCCTGCCNCAACTCGAGAGGAANCCTGAGT	BDI_clone3	238	268	1.09e-08	1.5e-05	GCCCTGCCAAGCCTCGAGCAGAATCCAGAGG
TCCCTGCCNCAACTCGAGAGGAANCCTGAGT	BDI_clone1	238	268	1.07e-07	3.7e-05	GCCCTGTCAAGCCTCGAGGAGAATCCCGAGG
TCCCTGCCNCAACTCGAGAGGAANCCTGAGT	OBE_clone3	238	268	1.09e-08	1.24e-05	GCCCTGCCAAGCCTCGAGGAGAATCCCGAGG
TCCCTGCCNCAACTCGAGAGGAANCCTGAGT	OVI_clone3	238	268	1.54e-06	0.000359	GCCCTGCCAGGCCTGGAAGAGATTCCTGAAT
TCCCTGCCNCAACTCGAGAGGAANCCTGAGT	OVI_clone2	238	268	1.54e-06	0.000359	GCCCTGCCAGGCCTGGAAGAGATTCCTGAAT
TCCCTGCCNCAACTCGAGAGGAANCCTGAGT	OVI_clone4	238	268	6.57e-06	0.00106	GCACTGCCAAGGCTCAAAGAGATTCCTGAGG
TCCCTGCCNCAACTCGAGAGGAANCCTGAGT	OBE_clone2	239	269	1.09e-08	1.24e-05	GCCCTGCCAAGCCTCGAGGAGAATCCCGAGG
TCCCTGCCNCAACTCGAGAGGAANCCTGAGT	MBO_clone2	246	276	1.43e-09	2.47e-06	GCCCTGCCAAGCCTCGAGGAGAATCCTGAGG
TCCCTGCCNCAACTCGAGAGGAANCCTGAGT	MBO_clone1	246	276	6.57e-06	0.00111	GCCCTGCCAAGCGTCGAGGAGAATATCGAGG
TCCCTGCCNCAACTCGAGAGGAANCCTGAGT	MAM_JU_clone2	246	276	6.57e-06	0.00116	GCCCTGCCAAGCGTCGACGAGAATACAGAGG
TCCCTGCCNCAACTCGAGAGGAANCCTGAGT	BDI_clone4	246	276	9.1e-07	0.000261	GCCCTGCCAAGCGTCGAGGAGAATACCGAGG
TCCCTGCCNCAACTCGAGAGGAANCCTGAGT	OVI_clone1	246	276	4.03e-05	0.00456	GCCCTGCCAAGCGTCGACGAGAATATCGAGG
TCCCTGCCNCAACTCGAGAGGAANCCTGAGT	MNA_clone2	247	277	1.06e-05	0.0017	GCCTTTCCAAGAGTCGAGGAGAATACCGAGG
TCCCTGCCNCAACTCGAGAGGAANCCTGAGT	MNA_clone4	247	277	4.03e-05	0.00514	GCCCTGCCAAGCCTGAAAGAGTATCCCGATT
TCCCTGCCNCAACTCGAGAGGAANCCTGAGT	MBO_clone4	247	277	6.57e-06	0.00111	GCCCTGCCAAGCGTCGACGAGAATACAGAGG
TCCCTGCCNCAACTCGAGAGGAANCCTGAGT	MAM_JU_clone1	247	277	6.57e-06	0.00116	GCCCTGCCAAGCGTCGACGAGAATACAGAGG
TCCCTGCCNCAACTCGAGAGGAANCCTGAGT	BDI_clone2	247	277	9.1e-07	0.000261	GCCCTGCCAAGCCTGAAGGAGTATCCCGAGT
TCCCTGCCNCAACTCGAGAGGAANCCTGAGT	OBE_clone4	247	277	4.03e-05	0.0046	GCTCTGCCAAGCGTCGACGAGAATACCGAGG
TCCCTGCCNCAACTCGAGAGGAANCCTGAGT	OBE_clone1	247	277	4.03e-05	0.0046	GCTCTGCCAAGCGTCGACGAGAATACCGAGG
TCCCTGCCNCAACTCGAGAGGAANCCTGAGT	MAM_RR_clone4	266	296	2.83e-06	0.000595	TGTCCATCGTAACTCGACAGGAGTCCTGACA
TCCCTGCCNCAACTCGAGAGGAANCCTGAGT	MGO_clone3	268	298	5.06e-07	9.57e-05	TGTCCCTCGCAACTAGACAGGAGTCCTGACT
TCCCTGCCNCAACTCGAGAGGAANCCTGAGT	MGO_clone2	268	298	3.36e-06	0.000542	TGTCCCTCGCAACTAAACAGGAGTCCTGACT
TCCCTGCCNCAACTCGAGAGGAANCCTGAGT	MGO_clone1	268	298	3.5e-06	0.000552	TGTCCCTCACAACTAAACAGGAGTCCTGACT
TCCCTGCCNCAACTCGAGAGGAANCCTGAGT	MGO_clone4	268	298	8.62e-05	0.00793	TGTCCCTCGCAACTAAACAGGAGTACTGGCT
TCCCTGCCNCAACTCGAGAGGAANCCTGAGT	MNE_clone4	268	298	3.36e-06	0.000764	TGTCCCTCGCAACTAAACAGGAGTCCTGACT
TCCCTGCCNCAACTCGAGAGGAANCCTGAGT	MNE_clone1	268	298	1.7e-05	0.00249	TGTCCCTCGTAACTCGACAGCAGTCCTGACA
TCCCTGCCNCAACTCGAGAGGAANCCTGAGT	MNA_clone1	268	298	3.36e-06	0.000701	TGTCCCTCGCAACTAAACAGGAGTCCTGACT
TCCCTGCCNCAACTCGAGAGGAANCCTGAGT	MBO_clone3	268	298	1.7e-05	0.00229	TGTCCCTCGCAACTAAACAGGAGTCCTGGCT
TCCCTGCCNCAACTCGAGAGGAANCCTGAGT	MAM_PR_clone1	268	298	3.36e-06	0.00064	TGTCCCTCGCAACTAAACAGGAGTCCTGACT
TCCCTGCCNCAACTCGAGAGGAANCCTGAGT	MAM_PR_clone3	268	298	3.36e-06	0.00064	TGTCCCTCGCAACTAAACAGGAGTCCTGACT
TCCCTGCCNCAACTCGAGAGGAANCCTGAGT	MAM_SA_clone1	268	298	3.36e-06	0.000676	TGTCCCTCGCAACTAAACAGGAGTCCTGACT
TCCCTGCCNCAACTCGAGAGGAANCCTGAGT	MAM_JU_clone3	268	298	3.36e-06	0.000698	TGTCCCTCGCAACTAAACAGGAGTCCTGACT
TCCCTGCCNCAACTCGAGAGGAANCCTGAGT	MAM_JU_clone4	268	298	8.62e-05	0.00877	TGTCCCTCGTAAGTCGACACGAGTCCTGACG
TCCCTGCCNCAACTCGAGAGGAANCCTGAGT	MAM_RR_clone1	268	298	3.36e-06	0.000664	TGTCCCTCGCAACTAAACAGGAGTCCTGACT
TCCCTGCCNCAACTCGAGAGGAANCCTGAGT	MAM_RR_clone3	268	298	3.36e-06	0.000664	TGTCCCTCGCAACTAAACAGGAGTCCTGACT
TCCCTGCCNCAACTCGAGAGGAANCCTGAGT	OVI_clone2	268	298	8.62e-05	0.00886	TGTCCCTCGTAACTAGACATGAGTCCTGACG
TCCCTGCCNCAACTCGAGAGGAANCCTGAGT	OVI_clone3	268	298	8.62e-05	0.00886	TGTCCCTCGTAACTAGACATGAGTCCTGACG
TCCCTGCCNCAACTCGAGAGGAANCCTGAGT	MNE_clone3	269	299	2.42e-06	0.000592	TGTCCGTCATAACTCGACAGGTGTCCTGATG
TCCCTGCCNCAACTCGAGAGGAANCCTGAGT	MNE_clone2	269	299	1.7e-05	0.00249	TGTCCCTCGTAACTCGACAGCAGTCCTGACA
TCCCTGCCNCAACTCGAGAGGAANCCTGAGT	MNA_clone3	269	299	8.62e-05	0.00813	TGTCCCAAGCAACTAGACAGAAGTCCTGACA
TCCCTGCCNCAACTCGAGAGGAANCCTGAGT	MAM_PR_clone2	269	299	1.3e-05	0.00185	TGTCCCTCGTAACTCGACAGGTGTCCTGATG
TCCCTGCCNCAACTCGAGAGGAANCCTGAGT	MAM_PR_clone4	269	299	8.62e-05	0.00885	TGTCCCAAGCAACTAGACAGAAGTCCTGACA
TCCCTGCCNCAACTCGAGAGGAANCCTGAGT	MAM_SA_clone4	269	299	8.62e-05	0.00863	TGTCCCAAGCAACTAGACAGAAGTCCTGACA
TCCCTGCCNCAACTCGAGAGGAANCCTGAGT	MAM_SA_clone3	269	299	8.62e-05	0.00863	TGTCCCAAGCAACTAGACAGAAGTCCTGACA
TCCCTGCCNCAACTCGAGAGGAANCCTGAGT	BDI_clone1	269	299	1.9e-05	0.00242	TGTCCCTTGCAACTAGACAGTAGTCCTGACT
TCCCTGCCNCAACTCGAGAGGAANCCTGAGT	BDI_clone3	269	299	7.39e-05	0.00784	TGTCCCTCGGAAATAGACAGGAGCCCTGACA
TCCCTGCCNCAACTCGAGAGGAANCCTGAGT	OBE_clone3	269	299	5.06e-07	0.000165	TGTCCATCGCAACTAGACAGGAGTCCTGACT
TCCCTGCCNCAACTCGAGAGGAANCCTGAGT	OBE_clone2	270	300	5.06e-07	0.000165	TGTCCATCGCAACTAGACAGGAGTCCTGACT
TCCCTGCCNCAACTCGAGAGGAANCCTGAGT	MBO_clone2	277	307	3.5e-06	0.000652	TGTCCCTCTCAACTAAACAGGAGTCCTGACT
TCCCTGCCNCAACTCGAGAGGAANCCTGAGT	MBO_clone1	277	307	8.62e-05	0.00837	TGTCCCAAGCAACTAGACAGGAGTTCTGACG
TCCCTGCCNCAACTCGAGAGGAANCCTGAGT	BDI_clone4	277	307	1.7e-05	0.00229	TGTCCCAAGCAACTAGACAGGAGTCCTGACA
TCCCTGCCNCAACTCGAGAGGAANCCTGAGT	OVI_clone1	277	307	7.14e-05	0.00757	TGTCCCAAGCAACTAGACAGGTGTCCTGACG
TCCCTGCCNCAACTCGAGAGGAANCCTGAGT	MNA_clone4	278	308	3.16e-06	0.00068	TGTCCCTCACAACTGGACAGGAGTCCTGACG
TCCCTGCCNCAACTCGAGAGGAANCCTGAGT	MBO_clone4	278	308	7.14e-05	0.00746	TGTCCCAAGCAACTAGACGGGAGTCCTGACG
TCCCTGCCNCAACTCGAGAGGAANCCTGAGT	MAM_JU_clone1	278	308	7.14e-05	0.00765	TGTCCCAAGCAACTAGACTGGAGTCCTGACG
TCCCTGCCNCAACTCGAGAGGAANCCTGAGT	BDI_clone2	278	308	3.16e-06	0.000641	TGTCCCTCACAACTGGACAGGAGTCCTGACG
TCCCTGCCNCAACTCGAGAGGAANCCTGAGT	OBE_clone4	278	308	1.7e-05	0.00228	TGTCCCAAGCAACTAGACAGGAGTCCTGACG
TCCCTGCCNCAACTCGAGAGGAANCCTGAGT	OBE_clone1	278	308	1.7e-05	0.00228	TGTCCCAAGCAACTAGACAGGAGTCCTGACG
TCCCTGCCNCAACTCGAGAGGAANCCTGAGT	MNA_clone3	328	358	8.02e-05	0.00767	TCCCCATCTTAACTCCAGAATATTTCCAAGG
TCCCTGCCNCAACTCGAGAGGAANCCTGAGT	MAM_PR_clone4	328	358	8.02e-05	0.00836	TCCCCATCTTAACTCCAGAATATTTCCAAGG
TCCCTGCCNCAACTCGAGAGGAANCCTGAGT	MAM_SA_clone4	328	358	8.02e-05	0.00845	TCCCCATCTTAACTCCAGAATATTTCCAAGG
TCCCTGCCNCAACTCGAGAGGAANCCTGAGT	MAM_SA_clone3	328	358	8.02e-05	0.00845	TCCCCATCTTAACTCCAGAATATTTCCAAGG
TCCCTGCCNCAACTCGAGAGGAANCCTGAGT	MAM_RR_clone4	328	358	4.14e-09	1.04e-05	TCCCTGCCGTAACTCGAGAATACACCCCAGA
TCCCTGCCNCAACTCGAGAGGAANCCTGAGT	MAM_JU_clone4	329	359	1.19e-06	0.000325	ATCCCGCCGTAACTCGAGAATATACCCCAGG
TCCCTGCCNCAACTCGAGAGGAANCCTGAGT	MAM_RR_clone2	329	359	3.2e-07	9.34e-05	TCCCGGCCATAACTCAAGAATATACCACAGG
TCCCTGCCNCAACTCGAGAGGAANCCTGAGT	MGO_clone3	330	360	5.4e-09	8.94e-06	TCCCTGCCATAACTCGAGAACATACCCCAGG
TCCCTGCCNCAACTCGAGAGGAANCCTGAGT	MGO_clone1	330	360	3.42e-08	1.26e-05	TCCCCGCCTTAACTCGAGAACATACCCCAGG
TCCCTGCCNCAACTCGAGAGGAANCCTGAGT	MGO_clone2	330	360	3.42e-08	1.26e-05	TCCCCGCCTTAACTCGAGAACATACCCCAGG
TCCCTGCCNCAACTCGAGAGGAANCCTGAGT	MGO_clone4	330	360	3.42e-08	1.26e-05	TCCCCGCCTTAACTCGAGAACATACCCCAGG
TCCCTGCCNCAACTCGAGAGGAANCCTGAGT	MNE_clone4	330	360	3.42e-08	1.88e-05	TCCCCGCCTTAACTCGAGAACATACCCCAGG
TCCCTGCCNCAACTCGAGAGGAANCCTGAGT	MNE_clone1	330	360	1.98e-06	0.000504	TCCCCGTTGTAACTCGAGAATATACCCCAGG
TCCCTGCCNCAACTCGAGAGGAANCCTGAGT	MNA_clone1	330	360	3.42e-08	2.36e-05	TCCCCGCCTTAACTCGAGAACATACCCCAGG
TCCCTGCCNCAACTCGAGAGGAANCCTGAGT	MBO_clone3	330	360	3.42e-08	1.81e-05	TCCCCGCCTTAACTCGAGAACATACCCCAGG
TCCCTGCCNCAACTCGAGAGGAANCCTGAGT	MAM_PR_clone1	330	360	3.42e-08	2.07e-05	TCCCCGCCTTAACTCGAGAACATACCCCAGG
TCCCTGCCNCAACTCGAGAGGAANCCTGAGT	MAM_SA_clone1	330	360	3.42e-08	3.33e-05	TCCCCGCCTTAACTCGAGAACATACCCCAGG
TCCCTGCCNCAACTCGAGAGGAANCCTGAGT	MAM_SA_clone2	330	360	2.49e-07	0.000106	TCCCCGCCGTAACTCAAGAATATACCCCAGG
TCCCTGCCNCAACTCGAGAGGAANCCTGAGT	MAM_JU_clone3	330	360	3.42e-08	2.13e-05	TCCCCGCCTTAACTCGAGAACATACCCCAGG
TCCCTGCCNCAACTCGAGAGGAANCCTGAGT	MAM_RR_clone3	330	360	3.42e-08	1.92e-05	TCCCCGCCTTAACTCGAGAACATACCCCAGG
TCCCTGCCNCAACTCGAGAGGAANCCTGAGT	MAM_RR_clone1	330	360	3.2e-07	9.34e-05	TCCCCACCTTAACTCGAGAACATACCCCAGG
TCCCTGCCNCAACTCGAGAGGAANCCTGAGT	OVI_clone3	330	360	3.95e-07	0.000134	TCCCTGCCGTAACTCAAGAATATATCCCAGG
TCCCTGCCNCAACTCGAGAGGAANCCTGAGT	OVI_clone2	330	360	3.95e-07	0.000134	TCCCTGCCGTAACTCAAGAATATATCCCAGG
TCCCTGCCNCAACTCGAGAGGAANCCTGAGT	MNE_clone3	331	361	3.2e-07	0.000105	TCCCCGCCATAACTAGAGAATATACCACAGG
TCCCTGCCNCAACTCGAGAGGAANCCTGAGT	MNE_clone2	331	361	1.3e-05	0.00205	TCCCCGTTGTAACTCGAGAATATACCCCAAG
TCCCTGCCNCAACTCGAGAGGAANCCTGAGT	MAM_PR_clone2	331	361	5.28e-06	0.000951	TCCCCACCGTATCTCGAGAATGTACCCCAGG
TCCCTGCCNCAACTCGAGAGGAANCCTGAGT	MAM_PR_clone3	331	361	3.26e-05	0.00418	CCCCCCCCGGAATTCGGGAATATACCCCAGG
TCCCTGCCNCAACTCGAGAGGAANCCTGAGT	BDI_clone1	331	361	5.54e-08	2.59e-05	TCCCTGCCATAACTCGAGAACACACCCCAAG
TCCCTGCCNCAACTCGAGAGGAANCCTGAGT	BDI_clone3	331	361	1.98e-06	0.000456	TCCTCGTCGTAACGCGAGAATATACCCCAGT
TCCCTGCCNCAACTCGAGAGGAANCCTGAGT	OBE_clone3	331	361	2.49e-07	0.000122	TCCCCGCCGTAACTCGAGATCATAACCCAGG
TCCCTGCCNCAACTCGAGAGGAANCCTGAGT	OVI_clone4	331	361	1.98e-06	0.000434	TCCCCTCCGTAACTCGAGAATATACACCAGG
TCCCTGCCNCAACTCGAGAGGAANCCTGAGT	OBE_clone2	332	362	1.98e-06	0.000424	TCCCCGCCGTAAGTCGAGATCATAACCCAGG
TCCCTGCCNCAACTCGAGAGGAANCCTGAGT	MBO_clone2	339	369	2.42e-06	0.000464	TCCCCATCTTAACTCGAGAATATTCCCAAGG
TCCCTGCCNCAACTCGAGAGGAANCCTGAGT	MBO_clone1	339	369	1.06e-05	0.00149	ACCCCATCTTAACTCGAGAATATTCCCAAGG
TCCCTGCCNCAACTCGAGAGGAANCCTGAGT	MAM_JU_clone2	339	369	1.06e-05	0.00162	TCCCCATCTTATCTCGAGACTATTCCCAAGG
TCCCTGCCNCAACTCGAGAGGAANCCTGAGT	BDI_clone4	339	369	1.52e-05	0.00214	TCTCCATCTTAACTCGAGAATATTCCCAAGG
TCCCTGCCNCAACTCGAGAGGAANCCTGAGT	OVI_clone1	339	369	1.52e-05	0.00195	TCCTCATCTTAACTCGAGAATATTCCCAAGG
TCCCTGCCNCAACTCGAGAGGAANCCTGAGT	MNA_clone4	340	370	2.49e-07	9.02e-05	TCCCAGTCGTAACTCGAGAATATACCCCAGG
TCCCTGCCNCAACTCGAGAGGAANCCTGAGT	MNA_clone2	340	370	1.06e-05	0.0017	TCCCCATCTTAGCTCGAGAATATTCCCAAGG
TCCCTGCCNCAACTCGAGAGGAANCCTGAGT	MBO_clone4	340	370	1.06e-05	0.00149	TCCCCATCTTATCTCGAGACTATTCCCAAGG
TCCCTGCCNCAACTCGAGAGGAANCCTGAGT	MAM_JU_clone1	340	370	1.06e-05	0.00162	TCCCCATCTTATCTCGAGACTATTCCCAAGG
TCCCTGCCNCAACTCGAGAGGAANCCTGAGT	BDI_clone2	340	370	1.98e-06	0.000456	TCCCAGTTGTAACTCGAGAATATACCCCAGG
TCCCTGCCNCAACTCGAGAGGAANCCTGAGT	OBE_clone1	340	370	1.52e-05	0.00212	TCCCCATCTTAACTCAAGAATATTCCCCAGG
TCCCTGCCNCAACTCGAGAGGAANCCTGAGT	OBE_clone4	340	370	1.52e-05	0.00212	TCCCCATCTTAACTCAAGAATATTCCCCAGG
TCCCTGCCNCAACTCGAGAGGAANCCTGAGT	MNA_clone3	359	389	4.87e-08	2.58e-05	TTCCTGCTGCAACACGAGATAAACCATGAAA
TCCCTGCCNCAACTCGAGAGGAANCCTGAGT	MAM_PR_clone4	359	389	4.87e-08	2.32e-05	TTCCTGCTGCAACACGAGATAAACCATGAAA
TCCCTGCCNCAACTCGAGAGGAANCCTGAGT	MAM_SA_clone3	359	389	4.87e-08	3.33e-05	TTCCTGCTGCAACACGAGATAAACCATGAAA
TCCCTGCCNCAACTCGAGAGGAANCCTGAGT	MAM_SA_clone4	359	389	4.14e-07	0.000142	TTCCTGCTGTAACACGAGATAAACCATGAAA
TCCCTGCCNCAACTCGAGAGGAANCCTGAGT	MAM_RR_clone4	359	389	3.54e-11	2.38e-07	TCCCCGCCTCAACTCGAGAAAAACCATGAGA
TCCCTGCCNCAACTCGAGAGGAANCCTGAGT	MAM_JU_clone4	360	390	2.55e-09	5.81e-06	TCCCCGCTGCAACTCGAGAAAAGCCATGAGA
TCCCTGCCNCAACTCGAGAGGAANCCTGAGT	MAM_RR_clone2	360	390	4.65e-09	1.04e-05	TCACCGACGCAACTCGAGAAAAACCATGAGA
TCCCTGCCNCAACTCGAGAGGAANCCTGAGT	MGO_clone4	361	391	2.98e-08	1.26e-05	ATCCAACCGCAACTCGAGAAAAACCATGAGA
TCCCTGCCNCAACTCGAGAGGAANCCTGAGT	MGO_clone1	361	391	2.98e-08	1.26e-05	ATCCAACCGCAACTCGAGAAAAACCATGAGA
TCCCTGCCNCAACTCGAGAGGAANCCTGAGT	MGO_clone2	361	391	2.98e-08	1.26e-05	ATCCAACCGCAACTCGAGAAAAACCATGAGA
TCCCTGCCNCAACTCGAGAGGAANCCTGAGT	MGO_clone3	361	391	2.8e-07	6.39e-05	ATCCAACCGCAACTTGAGAAAAACCATGAGA
TCCCTGCCNCAACTCGAGAGGAANCCTGAGT	MNE_clone1	361	391	4.14e-09	6.83e-06	TCCCCACCACACCTCGAGAAAAACCATGAGA
TCCCTGCCNCAACTCGAGAGGAANCCTGAGT	MNE_clone4	361	391	2.98e-08	1.79e-05	ATCCAACCGCAACTCGAGAAAAACCATGAGA
TCCCTGCCNCAACTCGAGAGGAANCCTGAGT	MNA_clone1	361	391	2.98e-08	2.28e-05	ATCCAACCGCAACTCGAGAAAAACCATGAGA
TCCCTGCCNCAACTCGAGAGGAANCCTGAGT	MBO_clone3	361	391	2.98e-08	1.71e-05	ATCCAACCGCAACTCGAGAAAAACCATGAGA
TCCCTGCCNCAACTCGAGAGGAANCCTGAGT	MAM_PR_clone1	361	391	1.65e-07	5.24e-05	ATCCAACCGCAACTCGAGAAAAACCACGAGA
TCCCTGCCNCAACTCGAGAGGAANCCTGAGT	MAM_SA_clone2	361	391	4.65e-09	7.96e-06	TCCCCACCGCAACTGGAGAAAAACCATGAGA
TCCCTGCCNCAACTCGAGAGGAANCCTGAGT	MAM_SA_clone1	361	391	2.8e-07	0.000106	ATCCAACTGCAACTCGAGAAAAACCATGAGA
TCCCTGCCNCAACTCGAGAGGAANCCTGAGT	MAM_JU_clone3	361	391	2.98e-08	2.04e-05	ATCCAACCGCAACTCGAGAAAAACCATGAGA
TCCCTGCCNCAACTCGAGAGGAANCCTGAGT	MAM_RR_clone1	361	391	2.98e-08	1.82e-05	ATCCAACCGCAACTCGAGAAAAACCATGAGA
TCCCTGCCNCAACTCGAGAGGAANCCTGAGT	MAM_RR_clone3	361	391	2.98e-08	1.82e-05	ATCCAACCGCAACTCGAGAAAAACCATGAGA
TCCCTGCCNCAACTCGAGAGGAANCCTGAGT	OVI_clone3	361	391	1.71e-10	5.79e-07	TCCCCGCCGCAACTCGAGCAAAACCATGAGA
TCCCTGCCNCAACTCGAGAGGAANCCTGAGT	OVI_clone2	361	391	1.71e-10	5.79e-07	TCCCCGCCGCAACTCGAGCAAAACCATGAGA
TCCCTGCCNCAACTCGAGAGGAANCCTGAGT	MNE_clone3	362	392	1.97e-12	1.3e-08	TCCCTGCCCCAACTCGAGAAAAACCATGAGA
TCCCTGCCNCAACTCGAGAGGAANCCTGAGT	MNE_clone2	362	392	2.98e-08	1.79e-05	TCCCCACCGCACCTCGAGAAAAACTATGAGA
TCCCTGCCNCAACTCGAGAGGAANCCTGAGT	MAM_PR_clone3	362	392	4.65e-09	7.76e-06	TCCCCATCGCAACTCGAGAAAAACCATGAGA
TCCCTGCCNCAACTCGAGAGGAANCCTGAGT	MAM_PR_clone2	362	392	6.65e-09	8.86e-06	TCTCCGCGACAACTCGAGAAAAACCATGAGA
TCCCTGCCNCAACTCGAGAGGAANCCTGAGT	BDI_clone1	362	392	2.98e-08	2.57e-05	ATCCAACCGCAACTCGAGAAAAACCATGAGA
TCCCTGCCNCAACTCGAGAGGAANCCTGAGT	BDI_clone3	362	392	4.87e-08	2.59e-05	TTTCTGCTGCAACTCGAGAAAAGCCATGAGA
TCCCTGCCNCAACTCGAGAGGAANCCTGAGT	OBE_clone3	362	392	2.15e-06	0.000433	ATCGAACCGCAACTTGAGAAAAACCATGAGA
TCCCTGCCNCAACTCGAGAGGAANCCTGAGT	OVI_clone4	362	392	3.95e-07	0.000134	TTCCCGCCACCACTTGAGAAAAACAATGAGA
TCCCTGCCNCAACTCGAGAGGAANCCTGAGT	OBE_clone2	363	393	2.15e-06	0.000433	ATCGAACCGCAACTTGAGAAAAACCATGAGA
TCCCTGCCNCAACTCGAGAGGAANCCTGAGT	MBO_clone1	370	400	6.52e-08	2.65e-05	TTCCTGCTGCAACTGGAGAAAAACCATGAAA
TCCCTGCCNCAACTCGAGAGGAANCCTGAGT	MBO_clone2	370	400	5.11e-07	0.000126	TTCCTGCTGCAAGTGGAGAAAAACCATGAAA
TCCCTGCCNCAACTCGAGAGGAANCCTGAGT	MAM_JU_clone2	370	400	1.3e-05	0.00194	TTCCTGCTGCAACACGAAAAAAAACCATGAA
TCCCTGCCNCAACTCGAGAGGAANCCTGAGT	BDI_clone4	370	400	6.89e-09	1.19e-05	TTCCTGCTGCAACTCGAGAAAAACCATGAAA
TCCCTGCCNCAACTCGAGAGGAANCCTGAGT	OVI_clone1	370	400	4.14e-07	0.000134	TTCCTGCTGCAACACCAGAAAAAGCATGAAA
TCCCTGCCNCAACTCGAGAGGAANCCTGAGT	MNA_clone4	371	401	4.65e-09	7.9e-06	TTCCCGTCGCAACTCGAGAAAAACCATGAGA
TCCCTGCCNCAACTCGAGAGGAANCCTGAGT	MNA_clone2	371	401	6.89e-09	7.9e-06	TTCCTGCTGCAACTCGAGAAAAACCATGAAA
TCCCTGCCNCAACTCGAGAGGAANCCTGAGT	MBO_clone4	371	401	4.14e-07	0.000124	TTCCTGCTGCAACACGAAAAAAACCATGAAA
TCCCTGCCNCAACTCGAGAGGAANCCTGAGT	MAM_JU_clone1	371	401	4.14e-07	0.000142	TTCCTGCTGCAACACGAAAAAAACCATGAAA
TCCCTGCCNCAACTCGAGAGGAANCCTGAGT	BDI_clone2	371	401	4.87e-08	2.59e-05	TTCCCATCGCAACTCGAGAAAAACCATGAGA
TCCCTGCCNCAACTCGAGAGGAANCCTGAGT	OBE_clone4	371	401	4.14e-07	0.000149	TTCCTGCTGCAACAAGAGAAAAACCATGAAA
TCCCTGCCNCAACTCGAGAGGAANCCTGAGT	OBE_clone1	371	401	4.14e-07	0.000149	TTCCTGCTGCAACAAGAGAAAAACCATGAAA
TCCCTGCCNCAACTCGAGAGGAANCCTGAGT	MAM_RR_clone4	390	420	7.14e-05	0.00801	TTTGCCCCTCAAAGTGAGATGAGGCCCGATT
TCCCTGCCNCAACTCGAGAGGAANCCTGAGT	MGO_clone3	392	422	1.3e-05	0.00166	TTTCCCACTCAGCGCGAGATGAGGCCTTATT
TCCCTGCCNCAACTCGAGAGGAANCCTGAGT	MGO_clone2	392	422	7.14e-05	0.00709	TTTCCCACTCAGCGCGAGATGAGGACTTATT
TCCCTGCCNCAACTCGAGAGGAANCCTGAGT	MGO_clone1	392	422	7.14e-05	0.00709	TTTCCCGCTCAGCGCGAGATGAGGACTTATT
TCCCTGCCNCAACTCGAGAGGAANCCTGAGT	MGO_clone4	392	422	7.14e-05	0.00709	TTTCCCGCTCAGCGCGAGATGAGGACTTATT
TCCCTGCCNCAACTCGAGAGGAANCCTGAGT	MNE_clone4	392	422	7.14e-05	0.00799	TTTCCCGCTCAGCGCGAGATGAGGACTTATT
TCCCTGCCNCAACTCGAGAGGAANCCTGAGT	MNA_clone1	392	422	7.14e-05	0.00745	TTTCCCGCTCAGCGCGAGATGAGGACTTATT
TCCCTGCCNCAACTCGAGAGGAANCCTGAGT	MBO_clone3	392	422	7.14e-05	0.00746	TTTCCCGCTCAGCGCGAGATGAGGACTTATT
TCCCTGCCNCAACTCGAGAGGAANCCTGAGT	MAM_PR_clone1	392	422	7.14e-05	0.00781	TTTCCCGCTCAGCGCGAGATGAGGACTTATT
TCCCTGCCNCAACTCGAGAGGAANCCTGAGT	MAM_SA_clone1	392	422	7.14e-05	0.00815	TTTCCCGCTCAGCGCGAGATGAGGACTTATT
TCCCTGCCNCAACTCGAGAGGAANCCTGAGT	MAM_JU_clone4	392	422	4.52e-08	2.38e-05	TTCATCCCTCAACGCGAGACGAGGCCCGATT
TCCCTGCCNCAACTCGAGAGGAANCCTGAGT	MAM_JU_clone3	392	422	7.14e-05	0.00765	TTTCCCGCTCAGCGCGAGATGAGGACTTATT
TCCCTGCCNCAACTCGAGAGGAANCCTGAGT	MAM_RR_clone3	392	422	7.14e-05	0.00801	TTTCCCGCTCAGCGCGAGATGAGGACTTATT
TCCCTGCCNCAACTCGAGAGGAANCCTGAGT	MAM_RR_clone1	392	422	7.14e-05	0.00801	TTTCCCGCTCAGCGCGAGATGAGGACTTATT
TCCCTGCCNCAACTCGAGAGGAANCCTGAGT	MAM_PR_clone3	393	423	5.06e-05	0.00602	CTTCCCACTCAAGGCGAGATGAGGCCCGATT
TCCCTGCCNCAACTCGAGAGGAANCCTGAGT	BDI_clone1	393	423	7.14e-05	0.00769	TTTCCCGCTCAGCACGAGATGAGGTCTTATT
TCCCTGCCNCAACTCGAGAGGAANCCTGAGT	OBE_clone3	393	423	1.3e-05	0.00198	TTTCCCGCTCAGCACGAGATGAGGCCTTATT
TCCCTGCCNCAACTCGAGAGGAANCCTGAGT	MNE_clone3	394	424	2.11e-05	0.00302	ATCCCCCCCCAAAACGCGATGAGGCCCGATA
TCCCTGCCNCAACTCGAGAGGAANCCTGAGT	MAM_PR_clone2	394	424	3.26e-05	0.00418	TTCCCCTCTCCAAGCGCGATGAGGCCCGATT
TCCCTGCCNCAACTCGAGAGGAANCCTGAGT	OBE_clone2	394	424	1.52e-05	0.00212	TTTCCCTCTCAGCGCGAGATGAGTCCTTATT
TCCCTGCCNCAACTCGAGAGGAANCCTGAGT	MNA_clone4	402	432	3.26e-05	0.00449	TTTCCCCCTCTCCATGAGATGAGGCCCGATT
TCCCTGCCNCAACTCGAGAGGAANCCTGAGT	MAM_RR_clone4	421	451	5.06e-05	0.0067	CCCCTACACTACATGCAGAGCAATCCAGTGA
TCCCTGCCNCAACTCGAGAGGAANCCTGAGT	MGO_clone3	423	453	7.14e-05	0.00709	CCCCTACAATGCTTGTAGAGCAAGTCTGTGT
TCCCTGCCNCAACTCGAGAGGAANCCTGAGT	MNE_clone1	423	453	8.47e-06	0.0016	CCCCTGCACTGCATGCAGAGCAATCCTGTGA
TCCCTGCCNCAACTCGAGAGGAANCCTGAGT	MNE_clone2	424	454	8.47e-06	0.0016	CCCCTGCACTGCATGCAGAGCAATCCTGTGA
TCCCTGCCNCAACTCGAGAGGAANCCTGAGT	BDI_clone1	424	454	1.7e-05	0.00229	TCCCTACAATGCTTGTAGAGCAAGTCTGTGT
TCCCTGCCNCAACTCGAGAGGAANCCTGAGT	OBE_clone4	432	462	9.07e-05	0.00849	CCCATTCATAGACTGTAGAGTAATTTTGTGT
TCCCTGCCNCAACTCGAGAGGAANCCTGAGT	OBE_clone1	432	462	9.07e-05	0.00849	CCCATTCATAGACTGTAGAGTAATTTTGTGT
TCCCTGCCNCAACTCGAGAGGAANCCTGAGT	MNA_clone4	433	463	7.14e-05	0.00745	CACCTGCACTGCGTGCAGAGAAATGCTGTGT
TCCCTGCCNCAACTCGAGAGGAANCCTGAGT	MGO_clone2	453	483	7.39e-05	0.00709	TTCCGCATCAAATACGAAAGGAGCCTTGACT
TCCCTGCCNCAACTCGAGAGGAANCCTGAGT	MGO_clone1	453	483	7.39e-05	0.00709	TTCCGCATCAAATACGAAAGGAGCCTTGACT
TCCCTGCCNCAACTCGAGAGGAANCCTGAGT	MGO_clone4	453	483	7.39e-05	0.00709	TTCCGCATCAAATACGAAAGGAGCCTTGACT
TCCCTGCCNCAACTCGAGAGGAANCCTGAGT	MNE_clone4	453	483	7.39e-05	0.00813	TTCCGCATCAAATACGAAAGGAGCCTTGACT
TCCCTGCCNCAACTCGAGAGGAANCCTGAGT	MNA_clone1	453	483	7.39e-05	0.00759	TTCCGCATCAAATACGAAAGGAGCCTTGACT
TCCCTGCCNCAACTCGAGAGGAANCCTGAGT	MBO_clone3	453	483	7.39e-05	0.00749	TTCCGCATCAAATACGAAAGGAGCCTTGACT
TCCCTGCCNCAACTCGAGAGGAANCCTGAGT	MAM_PR_clone1	453	483	7.39e-05	0.00795	TTCCACATCAAATACGAAAGGAGCCTTGACT
TCCCTGCCNCAACTCGAGAGGAANCCTGAGT	MAM_SA_clone1	453	483	7.39e-05	0.00829	TTCCGCATCAAATACGAAAGGAGCCTTGACT
TCCCTGCCNCAACTCGAGAGGAANCCTGAGT	MAM_JU_clone3	453	483	1.37e-05	0.002	TCCCACATCAAATACGAAAGGAGCCTTGACT
TCCCTGCCNCAACTCGAGAGGAANCCTGAGT	MAM_RR_clone3	453	483	7.39e-05	0.00801	TTCCACATCAAATACGAAAGGAGCCTTGACT
TCCCTGCCNCAACTCGAGAGGAANCCTGAGT	MAM_RR_clone1	453	483	7.39e-05	0.00801	TTCCACATCAAATACGAAAGGAGCCTTGACT
TCCCTGCCNCAACTCGAGAGGAANCCTGAGT	OVI_clone4	455	485	5.48e-05	0.0061	TTCCCAATCAAACATGTAAGGAGCCTTGAGT
TCCCTGCCNCAACTCGAGAGGAANCCTGAGT	MNA_clone4	463	493	1.37e-05	0.00201	TTCCCTATCAAACACGAAAGGAGCCTTGACT
TCCCTGCCNCAACTCGAGAGGAANCCTGAGT	BDI_clone2	463	493	1.37e-05	0.00202	TTCCCTATCAAACACGAAAGGAGCCTTGACT
TCCCTGCCNCAACTCGAGAGGAANCCTGAGT	MNA_clone3	480	510	3.68e-05	0.00487	TCCTTGATGGAGCTCCAGAGAGTCCCCAAGA
TCCCTGCCNCAACTCGAGAGGAANCCTGAGT	MAM_PR_clone4	480	510	3.68e-05	0.00454	TCCTTGAGGGAGCTCCAGAGAGTCCCCAAGA
TCCCTGCCNCAACTCGAGAGGAANCCTGAGT	MAM_SA_clone3	480	510	3.68e-05	0.00475	TCCTTGATGGAGCTCCAGAGAGTCCCCAAGA
TCCCTGCCNCAACTCGAGAGGAANCCTGAGT	MAM_SA_clone4	480	510	5.06e-05	0.00629	TCCTTGATGGAGCTCCAGAGAGTTCCCAAGA
TCCCTGCCNCAACTCGAGAGGAANCCTGAGT	MAM_RR_clone2	483	513	5.06e-05	0.0067	TGCTTGACGGATCTCGAGAGAGAAGCCAGGA
TCCCTGCCNCAACTCGAGAGGAANCCTGAGT	MGO_clone2	484	514	5.06e-05	0.00586	TCCTTGATGGGACTCCAGAGAGTACCGAAGA
TCCCTGCCNCAACTCGAGAGGAANCCTGAGT	MGO_clone3	484	514	5.06e-05	0.00586	TCCTTGTTGGGACTCCAGAGAGTACCGAAGA
TCCCTGCCNCAACTCGAGAGGAANCCTGAGT	MGO_clone4	484	514	5.06e-05	0.00586	TCCTTGATGGGACTCCAGAGAGTACCGAAGA
TCCCTGCCNCAACTCGAGAGGAANCCTGAGT	MNE_clone4	484	514	5.06e-05	0.00618	TCCTTGATGGGACTCCAGAGAGTACCGAAGA
TCCCTGCCNCAACTCGAGAGGAANCCTGAGT	MNA_clone1	484	514	5.06e-05	0.00609	TCCTTGATGGGACTCCAGAGAGTACCGAAGA
TCCCTGCCNCAACTCGAGAGGAANCCTGAGT	MAM_PR_clone1	484	514	5.06e-05	0.00602	TCCTTGATGGGACTCCAGAGAGTACCGAAGA
TCCCTGCCNCAACTCGAGAGGAANCCTGAGT	MAM_SA_clone2	484	514	3.68e-05	0.00475	TGCTTGAAGGATCTCGAGAGAGACCCCAGGA
TCCCTGCCNCAACTCGAGAGGAANCCTGAGT	MAM_SA_clone1	484	514	5.06e-05	0.00629	TCCTTGATGGGACTCCAGAGAGTACCGAAGA
TCCCTGCCNCAACTCGAGAGGAANCCTGAGT	MAM_JU_clone3	484	514	5.06e-05	0.00608	TCCTTGATGGGACTCCAGAGAGTACCGAAGA
TCCCTGCCNCAACTCGAGAGGAANCCTGAGT	MAM_RR_clone1	484	514	5.06e-05	0.0067	TCCTTGATGGGACTCCAGAGAGTACCGAAGA
TCCCTGCCNCAACTCGAGAGGAANCCTGAGT	MAM_RR_clone3	484	514	5.06e-05	0.0067	TCCTTGATGGGACTCCAGAGAGTACCGAAGA
TCCCTGCCNCAACTCGAGAGGAANCCTGAGT	BDI_clone1	485	515	5.06e-05	0.0062	TCCTTGATGGGACTCCAGAGAGTACCCAAGA
TCCCTGCCNCAACTCGAGAGGAANCCTGAGT	OBE_clone3	485	515	5.06e-05	0.00558	TCCTTGATGGTACTCCAGAGAGTACCGAAGA
TCCCTGCCNCAACTCGAGAGGAANCCTGAGT	OBE_clone2	486	516	5.06e-05	0.00558	TCCTTGATGGGACTCCAGAGAGTACCGAAGA
TCCCTGCCNCAACTCGAGAGGAANCCTGAGT	OVI_clone4	486	516	9.46e-06	0.00143	TGCTTGATGCAACTCCAGAGAGTCCCCAAGA
TCCCTGCCNCAACTCGAGAGGAANCCTGAGT	OVI_clone1	490	520	6.06e-06	0.001	TCCTTGACGGAGCTCCAGAGAGTCCCCAAGA
TCCCTGCCNCAACTCGAGAGGAANCCTGAGT	MBO_clone2	491	521	3.68e-05	0.00453	TCCTTGATGGAGCTCCAGAGAGTCCCCAAGA
TCCCTGCCNCAACTCGAGAGGAANCCTGAGT	MBO_clone1	491	521	5.06e-05	0.00591	TCCATGATGGATCTCCGGAGAGATCCCAAGA
TCCCTGCCNCAACTCGAGAGGAANCCTGAGT	MNA_clone2	492	522	5.48e-05	0.00609	TCCTTGATGGAACTACAGAGAGTCCCAAAGA
TCCCTGCCNCAACTCGAGAGGAANCCTGAGT	MBO_clone4	492	522	9.46e-06	0.00145	TCCTTGATGGAGCTCCAGAGAGTCCCTAAGA
TCCCTGCCNCAACTCGAGAGGAANCCTGAGT	MAM_JU_clone2	492	522	3.68e-05	0.00467	TCCTTGATGGAGCTCCAGAGAGTCCCCAAGA
TCCCTGCCNCAACTCGAGAGGAANCCTGAGT	MAM_JU_clone1	492	522	3.68e-05	0.00467	TCCTTGATGGAGCTCCAGAGAGTCCCCAAGA
TCCCTGCCNCAACTCGAGAGGAANCCTGAGT	OBE_clone1	492	522	3.68e-05	0.00449	TCCTTGATGGATCTCCAGAGAGTCCCCAAGA
TCCCTGCCNCAACTCGAGAGGAANCCTGAGT	OBE_clone4	492	522	3.68e-05	0.00449	TCCTTGATGGATCTCCAGAGAGTCCCCAAGA
TCCCTGCCNCAACTCGAGAGGAANCCTGAGT	MNA_clone4	494	524	5.48e-05	0.00609	TCCTTAATGGAACTCCAGAGAGTCCCCAAGA
TCCCTGCCNCAACTCGAGAGGAANCCTGAGT	BDI_clone2	494	524	5.48e-05	0.0062	TCCTTAATGGAACTCCAGAGAGTCCCCAAGA
TCCCTGCCNCAACTCGAGAGGAANCCTGAGT	MNA_clone3	511	541	8.47e-06	0.00153	ACACTGACACAAGTATTGAGGGACCCAGAAG
TCCCTGCCNCAACTCGAGAGGAANCCTGAGT	MAM_PR_clone4	511	541	3.26e-05	0.00418	ACACTGACACAAGTATTGAGGGACCCAGGAG
TCCCTGCCNCAACTCGAGAGGAANCCTGAGT	MAM_SA_clone4	511	541	3.26e-05	0.00437	ACACTGACACAAGTATTGAGGGACCCAGGAG
TCCCTGCCNCAACTCGAGAGGAANCCTGAGT	MAM_SA_clone3	511	541	3.26e-05	0.00437	ACACTGACACAAGTATTGAGGGACCCAGGAG
TCCCTGCCNCAACTCGAGAGGAANCCTGAGT	MAM_RR_clone4	513	543	4.52e-08	2.17e-05	ACACTGTCACAAGTACAGAGGGACCCTGAGG
TCCCTGCCNCAACTCGAGAGGAANCCTGAGT	MAM_RR_clone2	514	544	4.52e-08	2.17e-05	ACACTGTCACACGTCTAGAGGAACACTGAGG
TCCCTGCCNCAACTCGAGAGGAANCCTGAGT	MGO_clone2	515	545	5.54e-08	1.75e-05	ACACTGTCACAAGTCTAGAGGGATTCTGAGG
TCCCTGCCNCAACTCGAGAGGAANCCTGAGT	MGO_clone1	515	545	5.54e-08	1.75e-05	ACACTGTCACAAGTCTAGAGGGATTCTGAGG
TCCCTGCCNCAACTCGAGAGGAANCCTGAGT	MGO_clone4	515	545	5.54e-08	1.75e-05	ACACTGTCACAAGTCTAGAGGGATTCTGAGG
TCCCTGCCNCAACTCGAGAGGAANCCTGAGT	MGO_clone3	515	545	4.6e-07	9.57e-05	ACACTGTCACAAGTCTAGAGAGATTCTGAGG
TCCCTGCCNCAACTCGAGAGGAANCCTGAGT	MNE_clone1	515	545	4.14e-09	6.83e-06	ACACTGTCACAACTAGAGAGGGACACTGAGG
TCCCTGCCNCAACTCGAGAGGAANCCTGAGT	MNE_clone4	515	545	5.54e-08	2.44e-05	ACACTGTCACAAGTCTAGAGGGATTCTGAGG
TCCCTGCCNCAACTCGAGAGGAANCCTGAGT	MNA_clone1	515	545	5.54e-08	2.72e-05	ACACTGTCACAAGTCTAGAGGGATTCTGAGG
TCCCTGCCNCAACTCGAGAGGAANCCTGAGT	MBO_clone3	515	545	5.54e-08	2.65e-05	ACACTGTCACAAGTCTAGAGGGATTCTGAGG
TCCCTGCCNCAACTCGAGAGGAANCCTGAGT	MAM_PR_clone1	515	545	5.54e-08	2.46e-05	ACACTGTCACAAGTCTAGAGGGATTCTGAGG
TCCCTGCCNCAACTCGAGAGGAANCCTGAGT	MAM_SA_clone1	515	545	5.54e-08	3.45e-05	ACACTGTCACAAGTCTAGAGGGATTCTGAGG
TCCCTGCCNCAACTCGAGAGGAANCCTGAGT	MAM_SA_clone2	515	545	2.49e-07	0.000106	ACACTGTCACACGTCTAGAGGGACCTTGAGG
TCCCTGCCNCAACTCGAGAGGAANCCTGAGT	MAM_JU_clone3	515	545	4.52e-08	2.38e-05	ACACTGTCGCAAGTCTAGAGGGATTCTGAGG
TCCCTGCCNCAACTCGAGAGGAANCCTGAGT	MAM_JU_clone4	515	545	1.38e-07	5.57e-05	ACACTGTCACTAGGAGAGAGGGACCCTGAGG
TCCCTGCCNCAACTCGAGAGGAANCCTGAGT	MAM_RR_clone1	515	545	5.54e-08	2.33e-05	ACACTGTCACAAGTCTAGAGGGATTCTGAGG
TCCCTGCCNCAACTCGAGAGGAANCCTGAGT	MAM_RR_clone3	515	545	5.54e-08	2.33e-05	ACACTGTCACAAGTCTAGAGGGATTCTGAGG
TCCCTGCCNCAACTCGAGAGGAANCCTGAGT	OVI_clone3	515	545	4.52e-08	3.06e-05	ACACTGTCAGAAGTCTAGAGGGACCCTGAGG
TCCCTGCCNCAACTCGAGAGGAANCCTGAGT	OVI_clone2	515	545	4.52e-08	3.06e-05	ACACTGTCAGAAGTCTAGAGGGACCCTGAGG
TCCCTGCCNCAACTCGAGAGGAANCCTGAGT	MNE_clone2	516	546	4.52e-08	2.13e-05	ACACTGTCACAAGTAGAGAGGGACCCTGACG
TCCCTGCCNCAACTCGAGAGGAANCCTGAGT	MAM_PR_clone3	516	546	2.04e-09	4.54e-06	ACCCTGTCACAAGTTGAGAGGGGCCCTGAGG
TCCCTGCCNCAACTCGAGAGGAANCCTGAGT	BDI_clone3	516	546	4.14e-09	1.19e-05	ACACTGTCACAAGTCTAGAGGGACCCTGAGA
TCCCTGCCNCAACTCGAGAGGAANCCTGAGT	BDI_clone1	516	546	5.54e-08	2.59e-05	ACACTGTCACAAGTCTAGAGGGATTCTGAGG
TCCCTGCCNCAACTCGAGAGGAANCCTGAGT	OBE_clone3	516	546	2.42e-06	0.000461	ACACTGTCACAAGGCTAGAGAGATTCTGAGG
TCCCTGCCNCAACTCGAGAGGAANCCTGAGT	MNE_clone3	517	547	4.52e-08	2.13e-05	ACACTGTCTCAAGTACAGAGGGACCCTGAGG
TCCCTGCCNCAACTCGAGAGGAANCCTGAGT	MAM_PR_clone2	517	547	3.95e-07	0.000114	ACACTGTCACAAGTAGACAGAGACCCTGAGG
TCCCTGCCNCAACTCGAGAGGAANCCTGAGT	OBE_clone2	517	547	1.98e-06	0.000424	ACACTGTCACAAGGCTAGAGAGACTCTGAGG
TCCCTGCCNCAACTCGAGAGGAANCCTGAGT	OVI_clone4	517	547	2.49e-07	0.000134	ACACTGTAACAAGTCTAGGGGGACCCTGAGG
TCCCTGCCNCAACTCGAGAGGAANCCTGAGT	OVI_clone1	521	551	2.42e-06	0.00047	ACACTGACACAAGTATAGAGGGATCCAGAAG
TCCCTGCCNCAACTCGAGAGGAANCCTGAGT	MBO_clone1	522	552	1.3e-05	0.0018	ACACTGACACAAGTAAAGAGGGACCAAGATG
TCCCTGCCNCAACTCGAGAGGAANCCTGAGT	MBO_clone2	522	552	5.06e-05	0.00591	ACACTGACACAAGTATTGAGAGACCCAGAAG
TCCCTGCCNCAACTCGAGAGGAANCCTGAGT	BDI_clone4	522	552	1.98e-06	0.000456	ACACTGACACAAGTGTAGAGGGACCCAGAAG
TCCCTGCCNCAACTCGAGAGGAANCCTGAGT	MNA_clone2	523	553	3.95e-07	0.000124	ACACTGACACAAGTATAGAGGGACCCAGAAT
TCCCTGCCNCAACTCGAGAGGAANCCTGAGT	MBO_clone4	523	553	3.95e-07	0.000124	ACACTGACACAAGTATAGAGGAACCCAGAAG
TCCCTGCCNCAACTCGAGAGGAANCCTGAGT	MAM_JU_clone1	523	553	1.98e-06	0.000439	ACACTGACACAAGTATAGAGGGACCCAGAAG
TCCCTGCCNCAACTCGAGAGGAANCCTGAGT	MAM_JU_clone2	523	553	3.26e-05	0.00438	ACACTGACACAAGTATTGAGGGACCCAGGAG
TCCCTGCCNCAACTCGAGAGGAANCCTGAGT	OBE_clone1	523	553	2.83e-06	0.000509	ACACTGATACAAGTATAGAGGGACCCTGAAG
TCCCTGCCNCAACTCGAGAGGAANCCTGAGT	OBE_clone4	523	553	2.83e-06	0.000509	ACACTGAAACAAGTATAGAGGGACCCTGAAG
TCCCTGCCNCAACTCGAGAGGAANCCTGAGT	MNA_clone4	525	555	4.52e-08	2.58e-05	ACACTGTCACAAGTCTAGAGGGACCCTGAAG
TCCCTGCCNCAACTCGAGAGGAANCCTGAGT	BDI_clone2	525	555	4.52e-08	2.59e-05	ACACTGTCACAAGTCTAGAGGGACCCTGAAG
TCCCTGCCNCAACTCGAGAGGAANCCTGAGT	BDI_clone3	547	577	5.06e-05	0.0062	TCACTGCAGCAACATGAAAGTACACCATGAA
TCCCTGCCNCAACTCGAGAGGAANCCTGAGT	MNA_clone3	573	603	8.47e-06	0.00153	CCCTCAAATCATCTCGAGATGAGGCCTGAAC
TCCCTGCCNCAACTCGAGAGGAANCCTGAGT	MAM_PR_clone4	573	603	8.47e-06	0.00131	CCCTCAAATCATCTCGAGATGAGGCCTGAAC
TCCCTGCCNCAACTCGAGAGGAANCCTGAGT	MAM_SA_clone4	573	603	8.47e-06	0.00141	CCCTCAAATCATCTCGAGATGAGGCCTGAAC
TCCCTGCCNCAACTCGAGAGGAANCCTGAGT	MAM_SA_clone3	573	603	8.47e-06	0.00141	CCCTCAAATCATCTCGAGATGAGGCCTGAAC
TCCCTGCCNCAACTCGAGAGGAANCCTGAGT	MAM_RR_clone4	574	604	1.3e-05	0.00195	ACCCCAAATCAACTCGAAATGATGCCCAATT
TCCCTGCCNCAACTCGAGAGGAANCCTGAGT	MAM_RR_clone2	575	605	2.49e-07	7.97e-05	ACCCGAAATCAACTCGAGATGAGGCCCGATT
TCCCTGCCNCAACTCGAGAGGAANCCTGAGT	MGO_clone1	576	606	1.98e-06	0.000337	ACCCCAAATCAAATCGAGATGAGGCCCCAGT
TCCCTGCCNCAACTCGAGAGGAANCCTGAGT	MGO_clone2	576	606	1.98e-06	0.000337	ACCCCAAATCAAATCGAGATGAGGCCCCAGT
TCCCTGCCNCAACTCGAGAGGAANCCTGAGT	MGO_clone4	576	606	1.98e-06	0.000337	ACCCCAAATCAAATCGAGATGAGGCCCCAGT
TCCCTGCCNCAACTCGAGAGGAANCCTGAGT	MGO_clone3	576	606	1.3e-05	0.00166	ACCCCAAATCAAATCAAGATGAGGCCCCAGT
TCCCTGCCNCAACTCGAGAGGAANCCTGAGT	MNE_clone4	576	606	8.47e-06	0.0016	ACCCCAAATCAAATCGAGATGGGGCCCCAGT
TCCCTGCCNCAACTCGAGAGGAANCCTGAGT	MNE_clone1	576	606	5.06e-05	0.00618	ACCCCAAATCAACATGAGATGAGGCTCGATT
TCCCTGCCNCAACTCGAGAGGAANCCTGAGT	MNA_clone1	576	606	1.98e-06	0.000488	ACCCCAAATCAAATCGAGATGAGGCCCCAGT
TCCCTGCCNCAACTCGAGAGGAANCCTGAGT	MBO_clone3	576	606	1.98e-06	0.000391	ACCCCAAATCAAATCGAGATGAGGCCCCAGT
TCCCTGCCNCAACTCGAGAGGAANCCTGAGT	MAM_PR_clone1	576	606	1.98e-06	0.000401	ACCCCAAATCAAATCGAGATGAGGCCCCAGT
TCCCTGCCNCAACTCGAGAGGAANCCTGAGT	MAM_SA_clone1	576	606	1.98e-06	0.000424	ACCCCAAATCAAATCGAGATGAGGCCCCAGT
TCCCTGCCNCAACTCGAGAGGAANCCTGAGT	MAM_SA_clone2	576	606	1.98e-06	0.000424	ACACCAAATCAACTCGAGATGAGGCCCGATT
TCCCTGCCNCAACTCGAGAGGAANCCTGAGT	MAM_JU_clone4	576	606	1.19e-06	0.000325	ACCCCAAATCAGCTCGAGATGAGGCCCGATT
TCCCTGCCNCAACTCGAGAGGAANCCTGAGT	MAM_JU_clone3	576	606	1.98e-06	0.000439	ACCCCAAATCAAATCGAGATGAGGCCCCAGT
TCCCTGCCNCAACTCGAGAGGAANCCTGAGT	MAM_RR_clone1	576	606	1.98e-06	0.000445	ACCCCAAATCAAATCGAGATGAGGCCCCAGT
TCCCTGCCNCAACTCGAGAGGAANCCTGAGT	MAM_RR_clone3	576	606	2.42e-06	0.000526	ACCCCAAATCAAATCGAGATGAGACCCCAGT
TCCCTGCCNCAACTCGAGAGGAANCCTGAGT	OVI_clone3	576	606	2.53e-08	2.52e-05	ACCCCGAATCAACTCGAGATGAGGCCCGATT
TCCCTGCCNCAACTCGAGAGGAANCCTGAGT	OVI_clone2	576	606	2.53e-08	2.52e-05	ACCCCGAATCAACTCGAGATGAGGCCCGATT
TCCCTGCCNCAACTCGAGAGGAANCCTGAGT	MNE_clone2	577	607	1.3e-05	0.00205	ACCCCAAATCAACTCAAGATGAGGCTCGAAT
TCCCTGCCNCAACTCGAGAGGAANCCTGAGT	MAM_PR_clone3	577	607	1.19e-06	0.000282	ACCGCACATCAACTCGAGATGTGGCCCGATT
TCCCTGCCNCAACTCGAGAGGAANCCTGAGT	BDI_clone1	577	607	1.3e-05	0.002	ACCCCAAATCAAATCGAGATGAGGCCCCAAT
TCCCTGCCNCAACTCGAGAGGAANCCTGAGT	OBE_clone3	577	607	1.98e-06	0.000424	ACCCCAAATCAAATCGAGATGAGGCCCCAGT
TCCCTGCCNCAACTCGAGAGGAANCCTGAGT	OVI_clone4	577	607	1.98e-06	0.000434	ACCTAAAATCACCTCGAGATGAAGCCCGATT
TCCCTGCCNCAACTCGAGAGGAANCCTGAGT	MNE_clone3	578	608	1.3e-05	0.00205	ACCCCAAATCAACTCGAGACTAGGCCCAATT
TCCCTGCCNCAACTCGAGAGGAANCCTGAGT	MAM_PR_clone2	578	608	5.28e-06	0.000951	ACCCCAAATCACCTCGAGATGAGGCCCGATG
TCCCTGCCNCAACTCGAGAGGAANCCTGAGT	OBE_clone2	578	608	1.98e-06	0.000424	ACCCCAAATCAAATCGAGATGAGGCCCCAGT
TCCCTGCCNCAACTCGAGAGGAANCCTGAGT	OVI_clone1	583	613	1.3e-05	0.00177	CCCTCAAATCATCTTGAGATGAGGCCTGAAT
TCCCTGCCNCAACTCGAGAGGAANCCTGAGT	MBO_clone2	584	614	1.98e-06	0.000391	CCCTCAAATCATCTCGAGATGAGGCCTGAAT
TCCCTGCCNCAACTCGAGAGGAANCCTGAGT	MBO_clone4	585	615	1.98e-06	0.000391	CTCCCAAATCATCTCGAGATGAGGCCTGAAT
TCCCTGCCNCAACTCGAGAGGAANCCTGAGT	MAM_JU_clone1	585	615	1.98e-06	0.000439	CTCCCAAATCATCTCGAGATGAGGCCTGAAT
TCCCTGCCNCAACTCGAGAGGAANCCTGAGT	MAM_JU_clone2	585	615	1.98e-06	0.000439	CCCTCAAGTCATCTCGAGATGAGGCCTGAAT
TCCCTGCCNCAACTCGAGAGGAANCCTGAGT	OBE_clone1	585	615	1.98e-06	0.000424	CCCTCAAATCACCTCGAGATGAGGCCTGAAT
TCCCTGCCNCAACTCGAGAGGAANCCTGAGT	OBE_clone4	585	615	1.98e-06	0.000424	CCCTCAAATCACCTCGAGATGAGGCCTGAAT
TCCCTGCCNCAACTCGAGAGGAANCCTGAGT	MNA_clone3	604	634	6.11e-05	0.00657	CCCCTGCATTAGATCCAGAGCCATTCCGCCT
TCCCTGCCNCAACTCGAGAGGAANCCTGAGT	MAM_PR_clone4	604	634	6.11e-05	0.00679	CCCCTGCATTAGATCCAGAGCCATTCCGCCT
TCCCTGCCNCAACTCGAGAGGAANCCTGAGT	MAM_SA_clone3	604	634	6.11e-05	0.00721	CCCCTGCATTAGATCCAGAGCCATTCCGCCT
TCCCTGCCNCAACTCGAGAGGAANCCTGAGT	MAM_SA_clone4	604	634	6.11e-05	0.00721	CCCCTGCATTAGATCCAGAGCCATTCCGCCT
TCCCTGCCNCAACTCGAGAGGAANCCTGAGT	MAM_RR_clone4	605	635	1.06e-05	0.00166	CCCCTGCCTTGATTCCAGAGACATCCCCCAT
TCCCTGCCNCAACTCGAGAGGAANCCTGAGT	MGO_clone1	607	637	6.57e-06	0.000946	CTCCTGCATTGGCTCCAGAGCCATCCCGTGT
TCCCTGCCNCAACTCGAGAGGAANCCTGAGT	MGO_clone3	607	637	6.57e-06	0.000946	CTCCTGCATTGGCTCCAGAGCCATCCCGTGT
TCCCTGCCNCAACTCGAGAGGAANCCTGAGT	MGO_clone4	607	637	6.57e-06	0.000946	CTCCTGCATTGGCTCCAGAGCCATCCCGTGT
TCCCTGCCNCAACTCGAGAGGAANCCTGAGT	MGO_clone2	607	637	6.57e-06	0.000946	CTCCTGCATTGGCTCCAGAGCCATCCCGTGT
TCCCTGCCNCAACTCGAGAGGAANCCTGAGT	MNE_clone4	607	637	6.57e-06	0.00136	CTCCTGCATTGGCTCCAGAGCCATCCCGTGT
TCCCTGCCNCAACTCGAGAGGAANCCTGAGT	MNE_clone1	607	637	6.57e-06	0.00136	CCCATGCCTTGACTCCAGAGCGAACCCCCGA
TCCCTGCCNCAACTCGAGAGGAANCCTGAGT	MNA_clone1	607	637	6.57e-06	0.00129	CTCCTGCATTGGCTCCAGAGCCATCCCGTGT
TCCCTGCCNCAACTCGAGAGGAANCCTGAGT	MBO_clone3	607	637	6.57e-06	0.00111	CTCCTGCATTGGCTCCAGAGCCATCCCGTGT
TCCCTGCCNCAACTCGAGAGGAANCCTGAGT	MAM_PR_clone1	607	637	6.57e-06	0.00112	CTCCTGCATTGGCTCCAGAGCCATCCCGTGT
TCCCTGCCNCAACTCGAGAGGAANCCTGAGT	MAM_SA_clone1	607	637	6.57e-06	0.00125	CTCCTGCATTGGCTCCAGAGCCATCCCGTGT
TCCCTGCCNCAACTCGAGAGGAANCCTGAGT	MAM_JU_clone3	607	637	6.57e-06	0.00116	CTCCTGCATTGGCTCCAGAGCCATCCCGTGT
TCCCTGCCNCAACTCGAGAGGAANCCTGAGT	MAM_JU_clone4	607	637	5.06e-05	0.00608	CCCCTGCTTTGATTCCAGAGCCAGCCCCCCT
TCCCTGCCNCAACTCGAGAGGAANCCTGAGT	MAM_RR_clone1	607	637	6.57e-06	0.00116	CTCCTGCATTTGCTCCAGAGCCATCCCGTGT
TCCCTGCCNCAACTCGAGAGGAANCCTGAGT	MAM_RR_clone3	607	637	6.57e-06	0.00116	CTCCTGCATTGGCTCCAGAGCCATCCCGTGT
TCCCTGCCNCAACTCGAGAGGAANCCTGAGT	OVI_clone2	607	637	4.03e-05	0.00456	CCCCTGCATTGGCTCCAAAGCCATCCCCCGT
TCCCTGCCNCAACTCGAGAGGAANCCTGAGT	OVI_clone3	607	637	4.03e-05	0.00456	CCCCTGCATTGGCTCCAAAGCCATCCCCCGT
TCCCTGCCNCAACTCGAGAGGAANCCTGAGT	MNE_clone2	608	638	6.57e-06	0.00136	TCCCTGCCTTGACTCCTGAGCCATACCCCGA
TCCCTGCCNCAACTCGAGAGGAANCCTGAGT	MAM_PR_clone3	608	638	6.43e-07	0.000165	CCCCTGCCTTGCCTCCAGAGACATCCCGTGC
TCCCTGCCNCAACTCGAGAGGAANCCTGAGT	BDI_clone1	608	638	6.57e-06	0.00122	CTCCTGCATTGGCTCCAGAGCCATCCCGTGT
TCCCTGCCNCAACTCGAGAGGAANCCTGAGT	BDI_clone3	608	638	6.11e-05	0.00679	TCCGTGCAATGGATCCAGAGCCATCCCGCAT
TCCCTGCCNCAACTCGAGAGGAANCCTGAGT	OBE_clone3	608	638	4.03e-05	0.0046	CTCCTGCATTGGCTCCAGAGCCATCCCATGT
TCCCTGCCNCAACTCGAGAGGAANCCTGAGT	OVI_clone4	608	638	1.84e-07	0.000113	CCCCTGCATTGACTCCAGAGCCATCCCGCGT
TCCCTGCCNCAACTCGAGAGGAANCCTGAGT	MNE_clone3	609	639	1.84e-07	6.38e-05	CCCCTGCCTTGACTCGAGAGCCATACCCCGT
TCCCTGCCNCAACTCGAGAGGAANCCTGAGT	MAM_PR_clone2	609	639	1.54e-06	0.00032	CCCCTGCCTTGACTCCAGAGCCATACCCCGT
TCCCTGCCNCAACTCGAGAGGAANCCTGAGT	OBE_clone2	609	639	6.57e-06	0.0011	CTCCTGCATTGGCTCCAGAGCCATCCCGTGT
TCCCTGCCNCAACTCGAGAGGAANCCTGAGT	MNA_clone4	616	646	4.03e-05	0.00514	CCCCTGACATGGCTTCAGAGCTGACCTGCAT
TCCCTGCCNCAACTCGAGAGGAANCCTGAGT	MAM_JU_clone2	616	646	6.11e-05	0.00675	CCCCTGCATTAGATCCAGAGCCATTCTGCCA
TCCCTGCCNCAACTCGAGAGGAANCCTGAGT	BDI_clone2	616	646	1.19e-06	0.000314	CCCCTGCCGTGGCTTCAGAGCTAACCTGCAT
TCCCTGCCNCAACTCGAGAGGAANCCTGAGT	MAM_RR_clone1	637	667	7.39e-05	0.00801	TTCTCCATCAAACTCGACAGGTGGCTTGACT
TCCCTGCCNCAACTCGAGAGGAANCCTGAGT	MNA_clone2	664	694	6.11e-05	0.00657	TTCCTTAATCAACTTCGGAGATAACCCGGGA
TCCCTGCCNCAACTCGAGAGGAANCCTGAGT	MNA_clone3	665	695	1.52e-05	0.00218	TTCCTTAATCAATTCCAGAGATAACCCGGGA
TCCCTGCCNCAACTCGAGAGGAANCCTGAGT	MAM_PR_clone4	665	695	1.52e-05	0.00211	TTCCTTAATCAATTCCAGAGATAACCCGGGA
TCCCTGCCNCAACTCGAGAGGAANCCTGAGT	MAM_SA_clone3	665	695	1.52e-05	0.00222	TTCCTTAATCAATTCCAGAGATAACCCGGGA
TCCCTGCCNCAACTCGAGAGGAANCCTGAGT	MAM_SA_clone4	665	695	1.52e-05	0.00222	TTCCTTAATCAATTCCAGAGATAACCCGGGA
TCCCTGCCNCAACTCGAGAGGAANCCTGAGT	MAM_RR_clone4	666	696	5.48e-05	0.0067	TCCTTTAGGCAACTCCAGAGTTTCGCATAGG
TCCCTGCCNCAACTCGAGAGGAANCCTGAGT	MAM_JU_clone4	667	697	9.46e-06	0.00158	TCCTTTAGGCAACTCCAGAATTTCCCCGAGA
TCCCTGCCNCAACTCGAGAGGAANCCTGAGT	MAM_RR_clone2	667	697	1.37e-06	0.000317	TCCTTTAAGCAACTCCAGAAGTTCCCCGAGA
TCCCTGCCNCAACTCGAGAGGAANCCTGAGT	MGO_clone1	668	698	5.48e-05	0.00586	TCCTTTAGGAAACTCCAGAGATTCCACGAGG
TCCCTGCCNCAACTCGAGAGGAANCCTGAGT	MGO_clone3	668	698	5.48e-05	0.00586	TCCTTTAGGAAACTCCAGAGATCCCACGAGG
TCCCTGCCNCAACTCGAGAGGAANCCTGAGT	MGO_clone4	668	698	5.48e-05	0.00586	TCCTTTAGGAAACTCCAGAGATTCCACGAGG
TCCCTGCCNCAACTCGAGAGGAANCCTGAGT	MNE_clone1	668	698	9.46e-06	0.00164	TAGTTTAGGCAACTCCAGAGGTTCCCCGAGA
TCCCTGCCNCAACTCGAGAGGAANCCTGAGT	MNE_clone4	668	698	5.48e-05	0.00646	TCCTTTAGGAAACTCCAGAGATTCCACGAGG
TCCCTGCCNCAACTCGAGAGGAANCCTGAGT	MNA_clone1	668	698	5.48e-05	0.00609	TCCTTTGGGAAACTCCAGAGATTCCACGAGG
TCCCTGCCNCAACTCGAGAGGAANCCTGAGT	MBO_clone3	668	698	5.48e-05	0.0063	TCCTTTAGGAAACTCCAGAGATTCCACGAGG
TCCCTGCCNCAACTCGAGAGGAANCCTGAGT	MAM_PR_clone1	668	698	5.48e-05	0.0063	TCCTTTAGGGAACTCCAGAGATTCCACGAGG
TCCCTGCCNCAACTCGAGAGGAANCCTGAGT	MAM_SA_clone2	668	698	9.46e-06	0.00151	TCCTTTAGGCAACTCCAGAATTTCCCCGAGA
TCCCTGCCNCAACTCGAGAGGAANCCTGAGT	MAM_SA_clone1	668	698	5.48e-05	0.0067	TCCTTTAGGAAACTCCAGAGATTCCACGAGG
TCCCTGCCNCAACTCGAGAGGAANCCTGAGT	MAM_JU_clone3	668	698	5.48e-05	0.00637	TCCTTTAGGAAACTCCAGAGATTCCACGAGG
TCCCTGCCNCAACTCGAGAGGAANCCTGAGT	MAM_RR_clone3	668	698	5.48e-05	0.0067	TCCTTTAGGAAACTCCAGAGATTCCACGAGG
TCCCTGCCNCAACTCGAGAGGAANCCTGAGT	MAM_RR_clone1	668	698	5.48e-05	0.0067	TCCTTTAGGAAACTCCAGAGATTCCACGAGG
TCCCTGCCNCAACTCGAGAGGAANCCTGAGT	OVI_clone2	668	698	1.37e-06	0.000344	TCCTTTAGGCAACTCCAGAGATTCCCCGAGA
TCCCTGCCNCAACTCGAGAGGAANCCTGAGT	OVI_clone3	668	698	1.37e-06	0.000344	TCCTTTAGGCAACTCCAGAGATTCCCCGAGA
TCCCTGCCNCAACTCGAGAGGAANCCTGAGT	MNE_clone2	669	699	9.46e-06	0.00164	TCCTTTAGGCAACTCCAGAAGTTCCCCAAGA
TCCCTGCCNCAACTCGAGAGGAANCCTGAGT	MAM_PR_clone3	669	699	8.52e-07	0.00021	TCCTTTAAGCAGCTCCAGAGGTTCCCCGAGA
TCCCTGCCNCAACTCGAGAGGAANCCTGAGT	BDI_clone1	669	699	5.48e-05	0.0062	TCCTTTAGGAAACTCCAGAGATTCCAGGAGG
TCCCTGCCNCAACTCGAGAGGAANCCTGAGT	OVI_clone4	669	699	9.46e-06	0.00143	TTCTTTAGGCAACTCCAGAGATTCCCCGAGA
TCCCTGCCNCAACTCGAGAGGAANCCTGAGT	MNE_clone3	670	700	9.46e-06	0.00164	TCCTTTAGGCAACTCCAGAGTTTCACAGAGA
TCCCTGCCNCAACTCGAGAGGAANCCTGAGT	MAM_PR_clone2	670	700	1.37e-06	0.000304	TCCTTTAGGCAACTCCAGAAGTTCCCCGAGA
TCCCTGCCNCAACTCGAGAGGAANCCTGAGT	MBO_clone1	675	705	6.11e-05	0.00668	TTCCTTAATCAACTTCGGAGATAACCCGGGA
TCCCTGCCNCAACTCGAGAGGAANCCTGAGT	OVI_clone1	675	705	1.06e-05	0.00153	TTCCTTAGTCATCTCCAGAGATAACCCGGGA
TCCCTGCCNCAACTCGAGAGGAANCCTGAGT	MBO_clone2	676	706	1.06e-05	0.00149	TTCCTTATTCAACTCCGGAGATAACCCGGGA
TCCCTGCCNCAACTCGAGAGGAANCCTGAGT	OBE_clone1	676	706	6.11e-05	0.00623	TTCCTTAATCAACTCCGGAGATAATCCGGGA
TCCCTGCCNCAACTCGAGAGGAANCCTGAGT	MNA_clone4	677	707	1.37e-05	0.00201	TCTTTTAGGCAACTCCAGACATTCCCTGAGA
TCCCTGCCNCAACTCGAGAGGAANCCTGAGT	MBO_clone4	677	707	1.06e-05	0.00149	TTCCTTAGTCAACTCCGGAGATAACCCGGGA
TCCCTGCCNCAACTCGAGAGGAANCCTGAGT	MAM_JU_clone2	677	707	1.06e-05	0.00162	TTCCTTAATCAACTCCGGAGATAACCCGGGA
TCCCTGCCNCAACTCGAGAGGAANCCTGAGT	MAM_JU_clone1	677	707	1.06e-05	0.00162	TTCCTTAGTCAACTCCGGAGATAACCCGGGA
TCCCTGCCNCAACTCGAGAGGAANCCTGAGT	BDI_clone2	677	707	9.46e-06	0.00155	TCCTGTAGGCAACTCCAGACATTCCCTGAGA
TCCCTGCCNCAACTCGAGAGGAANCCTGAGT	OBE_clone4	677	707	6.11e-05	0.00623	TTCCTTAATCAACTCCGGAGATAAACCGGGA
TCCCTGCCNCAACTCGAGAGGAANCCTGAGT	MNA_clone2	695	725	2.15e-06	0.000494	ACACCATCCGAACTCTAGAGGAACACCAAGT
TCCCTGCCNCAACTCGAGAGGAANCCTGAGT	MNA_clone3	696	726	2.8e-07	9.63e-05	ACACCGTCCCAAATCTAGAGGAACACCAAGT
TCCCTGCCNCAACTCGAGAGGAANCCTGAGT	MAM_PR_clone4	696	726	2.8e-07	8.48e-05	ACACCGTCCCAAATCTAGAGGAACACCAAGT
TCCCTGCCNCAACTCGAGAGGAANCCTGAGT	MAM_SA_clone3	696	726	2.8e-07	0.000106	ACACCGTCCCAAATCTAGAGGAACACCAAGT
TCCCTGCCNCAACTCGAGAGGAANCCTGAGT	MAM_SA_clone4	696	726	2.8e-07	0.000106	ACACCGTCCCAAATCTAGAGGAACGCCAAGT
TCCCTGCCNCAACTCGAGAGGAANCCTGAGT	MGO_clone3	699	729	5.06e-07	9.57e-05	TCACCGTCACAAGTCCAGAAGAACACCAAGT
TCCCTGCCNCAACTCGAGAGGAANCCTGAGT	MGO_clone1	699	729	5.06e-07	9.57e-05	TCACCGTCACATGTCCATAGGAACACTAAGT
TCCCTGCCNCAACTCGAGAGGAANCCTGAGT	MGO_clone4	699	729	5.06e-07	9.57e-05	TCACCGTCACATGTCCATAGGAACACTAAGT
TCCCTGCCNCAACTCGAGAGGAANCCTGAGT	MGO_clone2	699	729	5.06e-07	9.57e-05	TCACCGTCACATGTCCATAGGAACACTAAGT
TCCCTGCCNCAACTCGAGAGGAANCCTGAGT	MNE_clone4	699	729	7.36e-08	3.04e-05	TCACTGTCACATGTCCATAGGAACGCTAAGT
TCCCTGCCNCAACTCGAGAGGAANCCTGAGT	MNE_clone1	699	729	1.7e-05	0.00249	ACAATGTTCCAAGCCTAGAGGAATACAAAGT
TCCCTGCCNCAACTCGAGAGGAANCCTGAGT	MNA_clone1	699	729	5.06e-07	0.000151	TCACCGTCACATGTCCATAGGAACACTAAGT
TCCCTGCCNCAACTCGAGAGGAANCCTGAGT	MBO_clone3	699	729	5.06e-07	0.000126	TCACCGTCACATGTCCATAGGAACACTAAGT
TCCCTGCCNCAACTCGAGAGGAANCCTGAGT	MAM_PR_clone1	699	729	5.06e-07	0.000135	TCACCGTCACATGTCCATAGGAACACTAAGT
TCCCTGCCNCAACTCGAGAGGAANCCTGAGT	MAM_SA_clone1	699	729	5.06e-07	0.000144	TCACCGTCACATGTCCATAGGAACACTAAGT
TCCCTGCCNCAACTCGAGAGGAANCCTGAGT	MAM_SA_clone2	699	729	8.62e-05	0.00863	AAAATGTGCCAAGCCTAGAGGAATTCCAAGT
TCCCTGCCNCAACTCGAGAGGAANCCTGAGT	MAM_JU_clone3	699	729	5.06e-07	0.000158	TCACCGTCACATGTCCATAGGAACACTAAGT
TCCCTGCCNCAACTCGAGAGGAANCCTGAGT	MAM_RR_clone3	699	729	5.06e-07	0.000131	TCACCGTCACATGTCCATAGGAACACTAAGT
TCCCTGCCNCAACTCGAGAGGAANCCTGAGT	MAM_RR_clone1	699	729	5.06e-07	0.000131	TCACCGTCACATGTCCATAGGAACACTAAGT
TCCCTGCCNCAACTCGAGAGGAANCCTGAGT	BDI_clone1	700	730	6.39e-08	2.59e-05	TCACCGTCACAAGTCCAGAGGAACACCAAGT
TCCCTGCCNCAACTCGAGAGGAANCCTGAGT	BDI_clone3	700	730	1.72e-05	0.00229	ACACTGTCCAAAGTCTAGAGGAACATTACAT
TCCCTGCCNCAACTCGAGAGGAANCCTGAGT	OBE_clone3	700	730	6.39e-08	5.03e-05	TCACCGTCACAAGTCCAGAGGAACACCAAGT
TCCCTGCCNCAACTCGAGAGGAANCCTGAGT	OVI_clone4	700	730	2.91e-06	0.000549	ACAGCGTCCCAAGTCTAGAGAAACACTAAGT
TCCCTGCCNCAACTCGAGAGGAANCCTGAGT	MNE_clone3	701	731	7.14e-05	0.00799	ACAAAGTGCCAAGCCTAGAGGAATACAAAGT
TCCCTGCCNCAACTCGAGAGGAANCCTGAGT	MAM_PR_clone2	701	731	1.7e-05	0.00231	ACAACGTGCCAAGTCTAGAGGAATACCAAGT
TCCCTGCCNCAACTCGAGAGGAANCCTGAGT	OBE_clone2	701	731	7.04e-08	5.03e-05	TCACCGTCACAAGTCCAGAGGAAAACCAAGT
TCCCTGCCNCAACTCGAGAGGAANCCTGAGT	MNE_clone2	702	732	8.62e-05	0.00918	AACCCGTGCCAAGTCTAGAAGAATTCCAAAT
TCCCTGCCNCAACTCGAGAGGAANCCTGAGT	MBO_clone1	706	736	2.98e-08	1.71e-05	ACACCGTCCCAACTCTAGAGGAACACCAAGT
TCCCTGCCNCAACTCGAGAGGAANCCTGAGT	OVI_clone1	706	736	3.95e-07	0.000134	ACACCGTCCCAAATCTAGAGGAATACCAAGT
TCCCTGCCNCAACTCGAGAGGAANCCTGAGT	MBO_clone2	707	737	1.64e-08	1.71e-05	ACACCGCCCCAACTCTAGAGGAGCACCAAGT
TCCCTGCCNCAACTCGAGAGGAANCCTGAGT	OBE_clone1	707	737	2.98e-08	2.91e-05	ACACCGTCCCAACTCTAGAGGAACACCAAGT
TCCCTGCCNCAACTCGAGAGGAANCCTGAGT	MNA_clone4	708	738	5.48e-05	0.00609	ACAATGTCCCAAGACCGGAGGAACACCAACT
TCCCTGCCNCAACTCGAGAGGAANCCTGAGT	MBO_clone4	708	738	2.98e-08	1.71e-05	ACACCGTCCCAACTCTAGAGGAACACCAAGT
TCCCTGCCNCAACTCGAGAGGAANCCTGAGT	MAM_JU_clone1	708	738	2.98e-08	2.04e-05	ACACCGTCCCAACTCTAGAGGAACACCAAGT
TCCCTGCCNCAACTCGAGAGGAANCCTGAGT	MAM_JU_clone2	708	738	2.8e-07	0.000107	ACACCATCCCAACTCTAGAGGAACACCAAGT
TCCCTGCCNCAACTCGAGAGGAANCCTGAGT	BDI_clone4	708	738	2.15e-06	0.000478	ACACCATCCCAAATCTAGAGGAACACCAAGT
TCCCTGCCNCAACTCGAGAGGAANCCTGAGT	OBE_clone4	708	738	1.65e-07	8.67e-05	ACACCGTCCCAACGCTAGAGGAACACCAAGT
TCCCTGCCNCAACTCGAGAGGAANCCTGAGT	MNA_clone2	726	756	5.48e-05	0.00609	TCAGCACAGCAATTCGAGAAAAGCTCCGTGT
TCCCTGCCNCAACTCGAGAGGAANCCTGAGT	MNA_clone3	727	757	2.15e-06	0.000494	TCAGCACAGCAACTCGAGAAAAAGTCTGTGG
TCCCTGCCNCAACTCGAGAGGAANCCTGAGT	MAM_PR_clone4	727	757	9.46e-06	0.00143	TCAGCACAGCAACTCGAGAAAAGCTCTGTGG
TCCCTGCCNCAACTCGAGAGGAANCCTGAGT	MAM_SA_clone4	727	757	9.46e-06	0.00151	TCAGCACAGCAACTCGAGAAAAGCTCTGTGG
TCCCTGCCNCAACTCGAGAGGAANCCTGAGT	MGO_clone2	730	760	1.65e-07	3.9e-05	TCACCGCAGCAACTCGAGAAAAGCTCCGTGT
TCCCTGCCNCAACTCGAGAGGAANCCTGAGT	MGO_clone4	730	760	1.65e-07	3.9e-05	TCACCGCAGCAACTCGAGAAAAGCTCCGTGT
TCCCTGCCNCAACTCGAGAGGAANCCTGAGT	MGO_clone1	730	760	1.65e-07	3.9e-05	TCACCGCAGCAACTCGAGAAAAGCTCCGTGT
TCCCTGCCNCAACTCGAGAGGAANCCTGAGT	MNE_clone4	730	760	1.65e-07	6.04e-05	TCACCGCAGCAACTCGAGAAAAGCTCCGTGT
TCCCTGCCNCAACTCGAGAGGAANCCTGAGT	MNA_clone1	730	760	1.65e-07	6.68e-05	TCACCGCAGCAACTCGAGAAAAGCTCCGTGT
TCCCTGCCNCAACTCGAGAGGAANCCTGAGT	MBO_clone3	730	760	1.65e-07	5.68e-05	TCACCGCGGCAACTCGAGAAAAGCTCCGTGT
TCCCTGCCNCAACTCGAGAGGAANCCTGAGT	MAM_PR_clone1	730	760	1.65e-07	5.24e-05	TCGCCGCAGCAACTCGAGAAAAGCTCCGTGT
TCCCTGCCNCAACTCGAGAGGAANCCTGAGT	MAM_SA_clone1	730	760	1.65e-07	9.41e-05	TCACCGCAGCAACTCGAGAAAAGCTCCGTGT
TCCCTGCCNCAACTCGAGAGGAANCCTGAGT	MAM_JU_clone3	730	760	1.37e-06	0.000361	TCACCGCAGCAACTCGAAAAAAGCTCCGTGT
TCCCTGCCNCAACTCGAGAGGAANCCTGAGT	MAM_RR_clone3	730	760	1.65e-07	6.16e-05	TCGCCGCAGCAACTCGAGAAAAGCTCCGTGT
TCCCTGCCNCAACTCGAGAGGAANCCTGAGT	MAM_RR_clone1	730	760	8.52e-07	0.000212	TCTCCGCAGCAACCCGAGAAAAGCTCCGTGT
TCCCTGCCNCAACTCGAGAGGAANCCTGAGT	BDI_clone1	731	761	9.46e-06	0.00155	TCAGCGCAGAGACTCGAGAAAAGCTCTGTGT
TCCCTGCCNCAACTCGAGAGGAANCCTGAGT	BDI_clone3	731	761	5.48e-05	0.0062	TCAGCACAGCAACTCAAGAAAAGCTCCGGGT
TCCCTGCCNCAACTCGAGAGGAANCCTGAGT	OBE_clone3	731	761	1.37e-06	0.00036	TCAGTGCAGCGACTCGAGAAAAGCTCCGTGT
TCCCTGCCNCAACTCGAGAGGAANCCTGAGT	OBE_clone2	732	762	1.37e-06	0.00036	TCAGTGCAGCGACTCGAGAAAAGCTCCGTGT
TCCCTGCCNCAACTCGAGAGGAANCCTGAGT	OVI_clone1	737	767	2.15e-06	0.000456	TCAGCACAGCAACTCGAGACAAGCTCTGTGT
TCCCTGCCNCAACTCGAGAGGAANCCTGAGT	MBO_clone2	738	768	3.68e-05	0.00453	TCAGCACAGCAACACGAGACAAGCTCCGTGT
TCCCTGCCNCAACTCGAGAGGAANCCTGAGT	OBE_clone1	738	768	5.48e-05	0.00577	TCAGCAGAGCAACTCGAGACAAGCTCCGCGT
TCCCTGCCNCAACTCGAGAGGAANCCTGAGT	MNA_clone4	739	769	3.68e-05	0.00487	TCAGCACAGCAACTCGAGAAAACCTCCGTGG
TCCCTGCCNCAACTCGAGAGGAANCCTGAGT	MBO_clone4	739	769	9.46e-06	0.00145	TCAGCACAGCAACACGAGACAAGCTCTGTGT
TCCCTGCCNCAACTCGAGAGGAANCCTGAGT	MAM_JU_clone1	739	769	3.68e-05	0.00467	TCAGCACAGCAACACGAGACAAGCTCCGTGT
TCCCTGCCNCAACTCGAGAGGAANCCTGAGT	BDI_clone4	739	769	5.48e-05	0.0062	TCAGCACAGCAACTCGAGAAAAGCTCCATGT
TCCCTGCCNCAACTCGAGAGGAANCCTGAGT	OBE_clone4	739	769	2.8e-07	0.000128	TCAACACAGCAACTCGAGACGAGCTCTGCGT
TCCCTGCCNCAACTCGAGAGGAANCCTGAGT	MGO_clone3	761	791	2.42e-06	0.000401	ACCCCAAGACATCTCGAGATGAGTGCTGATT
TCCCTGCCNCAACTCGAGAGGAANCCTGAGT	MGO_clone1	761	791	8.02e-05	0.00748	ACTCCAAGACATCTCGAGATGAGTGTTGATT
TCCCTGCCNCAACTCGAGAGGAANCCTGAGT	MGO_clone4	761	791	8.02e-05	0.00748	ACTCCAAGACATCTCGAGATGAGTGTTGATT
TCCCTGCCNCAACTCGAGAGGAANCCTGAGT	MNE_clone4	761	791	8.02e-05	0.00868	ACTCCAAGACATCTCGAGATGAGTGTTGATT
TCCCTGCCNCAACTCGAGAGGAANCCTGAGT	MNA_clone1	761	791	8.02e-05	0.00767	ACTCCAAGACATCTCGAGATGAGTGTTGATT
TCCCTGCCNCAACTCGAGAGGAANCCTGAGT	MBO_clone3	761	791	8.02e-05	0.0079	ACTCCAAGACATCTCGAGATGAGTGTTGATT
TCCCTGCCNCAACTCGAGAGGAANCCTGAGT	MAM_PR_clone1	761	791	8.02e-05	0.00836	ACTCCAAGACATCTCGAGATGAGTGTTGATT
TCCCTGCCNCAACTCGAGAGGAANCCTGAGT	MAM_SA_clone1	761	791	8.02e-05	0.00845	ACTCCAAGACATCTCGAGATGAGTGTTGATT
TCCCTGCCNCAACTCGAGAGGAANCCTGAGT	MAM_JU_clone3	761	791	8.02e-05	0.00833	ACTCCAAGACATCTCGAGATGAGTGTTGATT
TCCCTGCCNCAACTCGAGAGGAANCCTGAGT	MAM_RR_clone3	761	791	8.02e-05	0.00843	ACTCCAAGACATCTCGAGATGAGTGTTGATT
TCCCTGCCNCAACTCGAGAGGAANCCTGAGT	MAM_RR_clone1	761	791	8.02e-05	0.00843	ACTCCAAGACATCTCGAGATGAGTGTTGATT
TCCCTGCCNCAACTCGAGAGGAANCCTGAGT	BDI_clone1	762	792	2.42e-06	0.000522	ACCCCAAGACATCTCGAGATGAGTGCTGATT
TCCCTGCCNCAACTCGAGAGGAANCCTGAGT	OBE_clone3	762	792	8.02e-05	0.00784	AACCCAAGAAATCTCGAGATGAGTGCTGATT
TCCCTGCCNCAACTCGAGAGGAANCCTGAGT	OVI_clone4	762	792	2.42e-06	0.00047	ACCCCACATCATATCGAGATGAGAGCTGATT
TCCCTGCCNCAACTCGAGAGGAANCCTGAGT	OBE_clone2	763	793	2.42e-06	0.000461	ACCCCAAGACATCTCGAGATGAGTGCTGATT
TCCCTGCCNCAACTCGAGAGGAANCCTGAGT	MAM_SA_clone3	765	795	7.14e-05	0.00815	ATCATCTCGAGAGTCGAGATGACTCCTTGGT
TCCCTGCCNCAACTCGAGAGGAANCCTGAGT	MBO_clone1	768	798	8.02e-05	0.0079	ACCACAAATCATCTCGAGAGTAGAGATGATT
TCCCTGCCNCAACTCGAGAGGAANCCTGAGT	BDI_clone4	770	800	1.52e-05	0.00214	ACCACAAATCATCTCGAGAGTAGACATGATT
TCCCTGCCNCAACTCGAGAGGAANCCTGAGT	MNA_clone3	789	819	8.02e-05	0.00767	CCCTGGATTCGACTCAAGAGGAATGACAAAT
TCCCTGCCNCAACTCGAGAGGAANCCTGAGT	MAM_SA_clone4	789	819	8.02e-05	0.00845	CCCTGGATTCGACTCAAGAGGAATGACAAAT
TCCCTGCCNCAACTCGAGAGGAANCCTGAGT	OVI_clone3	789	819	9.07e-05	0.00904	TTCCTGCTTAGACTCAAGACATATGCCAACT
TCCCTGCCNCAACTCGAGAGGAANCCTGAGT	OVI_clone2	789	819	9.07e-05	0.00904	TTCCTGCTTAGACTCAAGACATATGCCAACT
TCCCTGCCNCAACTCGAGAGGAANCCTGAGT	BDI_clone3	793	823	3.16e-06	0.000641	CCCTGGTTTCAACTCAAGAGGAATGCCAACT
TCCCTGCCNCAACTCGAGAGGAANCCTGAGT	OVI_clone4	793	823	6.11e-05	0.00668	CCCTGGCTTTGACTCAAGAGGTATGCCAACT
TCCCTGCCNCAACTCGAGAGGAANCCTGAGT	MNA_clone4	801	831	8.02e-05	0.00767	CCTTGGCTTCAACTCAAGAAGAATGCCAACG
TCCCTGCCNCAACTCGAGAGGAANCCTGAGT	BDI_clone2	801	831	1.06e-05	0.0017	CCCTGGCTTCGACTCAAGAGGAATGCCAACG
TCCCTGCCNCAACTCGAGAGGAANCCTGAGT	OVI_clone3	820	850	1.7e-05	0.00206	TTCCACAATTACCTCGAGAGGAGGCTTCACT
TCCCTGCCNCAACTCGAGAGGAANCCTGAGT	OVI_clone2	820	850	1.7e-05	0.00206	TTCCACAATTACCTCGAGAGGAGGCTTCACT
TCCCTGCCNCAACTCGAGAGGAANCCTGAGT	MAM_PR_clone3	824	854	3.68e-05	0.00454	TTCCAGAAGCCTCTCAAGAGGAGGCTTCTCT
TCCCTGCCNCAACTCGAGAGGAANCCTGAGT	BDI_clone1	824	854	7.14e-05	0.00769	TTCCAAAAACACCTCAAGGGGAAGCTTCTCT
TCCCTGCCNCAACTCGAGAGGAANCCTGAGT	MBO_clone4	830	860	7.39e-05	0.00749	TTTCTACAGCACCTCAAGAGGAGGAGTTTCT
TCCCTGCCNCAACTCGAGAGGAANCCTGAGT	MAM_JU_clone1	830	860	7.39e-05	0.00779	TTTCTACAGCACCTCAAGAGGAGGAGTTTCT
TCCCTGCCNCAACTCGAGAGGAANCCTGAGT	MAM_SA_clone3	849	879	8.7e-05	0.00863	CAGCTATAGGAATGTAAGAGAAACCCTGAGT
TCCCTGCCNCAACTCGAGAGGAANCCTGAGT	MGO_clone3	854	884	5.48e-05	0.00586	CAGCTCTTGGTATGTGAGAGGGACCCTGAGT
TCCCTGCCNCAACTCGAGAGGAANCCTGAGT	MGO_clone2	854	884	5.48e-05	0.00586	CAGCTCTTGGTATGTGAGAGGGACCCTGAGT
TCCCTGCCNCAACTCGAGAGGAANCCTGAGT	MGO_clone1	854	884	5.48e-05	0.00586	CAGCTCTTGGTATGTGAGAGGGACCCTGAGT
TCCCTGCCNCAACTCGAGAGGAANCCTGAGT	MGO_clone4	854	884	5.48e-05	0.00586	CAGCTCTTGGTATGTGAGAGGGACCCTGAGT
TCCCTGCCNCAACTCGAGAGGAANCCTGAGT	MNE_clone4	854	884	5.48e-05	0.00646	CAGCTCTTGGTATGTGAGAGGGACCCTGAGT
TCCCTGCCNCAACTCGAGAGGAANCCTGAGT	MNA_clone1	854	884	5.48e-05	0.00609	CAGCTCTTGGTATGTGAGAGGGACCCTGAGT
TCCCTGCCNCAACTCGAGAGGAANCCTGAGT	MBO_clone3	854	884	7.14e-05	0.00746	CAGCTCTTAGTATGTGAGAGGGACCCTGAGT
TCCCTGCCNCAACTCGAGAGGAANCCTGAGT	MAM_PR_clone1	854	884	5.48e-05	0.0063	CAGCTCTTGGTATGTGAGAGGGACCCTGAGT
TCCCTGCCNCAACTCGAGAGGAANCCTGAGT	MAM_RR_clone3	854	884	5.48e-05	0.0067	CAGCTCTTGGTATGTGAGAGGGACCCTGAGT
TCCCTGCCNCAACTCGAGAGGAANCCTGAGT	MAM_RR_clone1	854	884	5.48e-05	0.0067	CAGCTCTTGGTATGTGAGAGGGACCCTGAGT
TCCCTGCCNCAACTCGAGAGGAANCCTGAGT	OVI_clone4	854	884	1.37e-05	0.00183	TCACAATAGTTATGTGAGAGGAACCCTGATT
TCCCTGCCNCAACTCGAGAGGAANCCTGAGT	BDI_clone3	855	885	1.37e-05	0.00202	CAGCTATAGGAATGTGAGAGGGACCCTGAGT
TCCCTGCCNCAACTCGAGAGGAANCCTGAGT	BDI_clone1	855	885	5.48e-05	0.0062	CAGCTCTTGGTATGTGAGAGGGACCCTGAGT
TCCCTGCCNCAACTCGAGAGGAANCCTGAGT	OBE_clone3	855	885	5.48e-05	0.00577	CAGCTCTTGGTATGTGAGAGGGACCCTGAGT
TCCCTGCCNCAACTCGAGAGGAANCCTGAGT	OBE_clone2	857	887	5.48e-05	0.00577	CAGCTCTTGGTATGTGAGAGGGACCCTGAGT
TCCCTGCCNCAACTCGAGAGGAANCCTGAGT	MAM_JU_clone2	861	891	8.7e-05	0.00877	CAGCTATAGGAATGTAAGAGAAACCCTGAGT
