# Supplementary material for: Satellite DNA in Neotropical Deer Species
Source: Genes (Basel). 2021 Jan 19;12(1):123. doi: 10.3390/genes12010123 (PMC7835801; doi:10.3390/genes12010123)
Supplement: Supplementary file 1 [file genes-12-00123-s001.zip › Table_S4.pdf]

**Table S4.** Multiple sequence alignment composition and selected substitution models of cervid satellite sequences.

| Satellite sequence | Number of sequences | Alignment length (bp) | Proportion of gaps (%) | Substitution model | $\alpha$ |
|--------------------|---------------------|-----------------------|------------------------|--------------------|----------|
| satI               | 76                  | 934                   | 2.8                    | GTR + $\Gamma$     | 2.6      |
| satII              | 76                  | 690                   | 7.4                    | K80 + $\Gamma$     | 3.5      |
| satIII             | 65                  | 598                   | 1.4                    | GTR + $\Gamma$     | 0.7      |
| satIV              | 64                  | 747                   | 1.3                    | HKY + $\Gamma$     | 1.6      |
| <i>mt-cyb</i> gene | 18                  | 1140                  | 0                      | HKY + I            | I = 0.61 |

$\Gamma$  - rate heterogeneity between sites modelled with the  $\Gamma$  distribution,  $\alpha$  - shape parameter of the  $\Gamma$  distribution.
